# Supplementary material for: Genetic insights into ossification of the posterior longitudinal ligament of the spine
Source: eLife. 2023 Jul 18;12:e86514. doi: 10.7554/eLife.86514 (PMC10353864; doi:10.7554/eLife.86514)
Supplement: Supplementary file 1. [file elife-86514-supp1.xlsx]

## Sheet: ST1
Supplementaly Table 1. Characteristics of the subjects
Study	GWAS set 1		GWAS set 2		GWAS set 3
	Case	Control	Case	Control	Case	Control
Source	OPLL cohort 1	BioBank Japan	OPLL cohort 2	BioBank Japan	OPLL cohort 3	MGC Biobank database of NCGG
Platform	Illumina OmniExpressExome	Illumina OmniExpressExome or combination of Illumina OmniExpress and Illumina HumanExome	Illumina OmniExpressExome	Illumina OmniExpressExome or combination of Illumina OmniExpress and Illumina HumanExome	Illumina Asian Screening Array	Illumina Asian Screening Array
Genotyping#	RIKEN	RIKEN	RIKEN	RIKEN	NCGG	NCGG
Number of samples	1102	8191	609	6385	299	5430
Male / Female	754 / 348	4497 / 3,696	433 / 176	3,356 / 3,029	112 / 187	2,248 / 3,182
Age (s.d.)[year]	65.7 (10.3)	62.7 (12.7)	66.1 (10.0)	43.8 (18.1)	62.0 (12.6)	76.5 (8.0)
Disease (number)	Cervical OPLL* (508)	Cerebral aneurysm (1,217)	Cervical OPLL*(312)	Graves disease (1,688)	Thoracic OPLL** (299)	Alzheimer's disease (2,416)
	Thoracic OPLL** (236)	COPD (1,097)	Thoracic OPLL** (116)	Epilepsy (1,651)		Healty subjects (1,543)
	Other OPLL*** (358)	Esophageal cancer (1,033)	Other OPLL*** (181)	Atopic dermatitis (1,433)		Mild cognitive impairment (817)
		Glaucoma (1,016)		Urolithiasis (1,022)		Lewy body dementia (179)
		Colorectal cancer (866)		Nephrotic syndrome (591)		Vascular dementia (89)
		Endometrial cancer (813)				Normal-pressure hydrocephalus (36)
		Arrhythmia (780)				Frontotemporal lobar degeneration (36)
		Keloid (691)				Other (314)
		Ischemic stroke (687)
Excrusion criteria		Diabetes mellitus		Diabetes mellitus		Diabetes mellitus
		Osteoporosis		Osteoporosis		Osteoporosis
GWAS, genome wide association study; OPLL, ossification of the posterior longitudinal ligament of the spine.
*OPLL limited to the cervical spine, **OPLL affecting more than two vertebrae in the thoracic spine, ***OPLL other than cervical and thoracic OPLL.
# Samples were genotyped according to the manufacturer's protocol.
