# Supplementary material for: Genetic insights into ossification of the posterior longitudinal ligament of the spine
Source: eLife. 2023 Jul 18;12:e86514. doi: 10.7554/eLife.86514 (PMC10353864; doi:10.7554/eLife.86514)
Supplement: Supplementary file 2. [file elife-86514-supp2.xlsx]

## Sheet: ST2
Supplementaly Table 2. Independent signals identified by a conditional analysis
SNP	CHR	Position	Condition SNP	REF	ALT	ALT allele frequency						Unconditional			Conditional
						GWAS set 1		GWAS set 2		GWAS set 3
						Case	Control	Case	Control	Case	Control	P value	OR (95%CI)		P value	OR (95%CI)
rs1277650091	2	27663106	rs4665972	C	T	0.00907784	0.00471334	0.0102176	0.00525674	0.00395585	0.00589361	0.000556	1.99 (1.35-2.95)		5.332e-05	2.25 (1.52-3.33)
rs72859036	6	43637415	rs927485	G	A	0.0205445	0.0306689	0.0216693	0.0298167	0.0184113	0.027305	0.000378	0.64 (0.50-0.82)		0.0004485	0.64 (0.50-0.82)
rs74453262	8	108927225	rs374810	G	A	0.010229	0.00726768	0.0139758	0.00690279	0.0132466	0.00720546	2.581e-06	2.74 (1.80-4.18)		5.851e-05	2.39 (1.56-3.66)
rs149400075	8	117499391	rs1898287	G	A	0.0120517	0.0223722	0.0135097	0.0202548	0.0155948	0.0234995	4.837e-05	0.52 (0.37-0.71)		0.0003619	0.56 (0.41-0.77)
rs183926297	11	87148014	rs35505248	T	C	0.0181194	0.0111806	0.0228916	0.00956571	0.0136439	0.00863094	1.345e-06	1.88 (1.45-2.42)		9.327e-05	1.67 (1.29-2.17)
rs35281060	12	19976182	rs10841442	TG	T	0.451357	0.499891	0.450689	0.505996	0.428906	0.504858	1.388e-12	0.79 (0.74-0.84)		1.041e-10	0.80 (0.75-0.86)
rs138903090	12	19976918	rs10841442, rs35281060	C	T	0.0382032	0.030976	0.0417531	0.032789	0.034777	0.0329792	0.0124	1.30 (1.06-1.60)		2.084e-05	1.58 (1.28-1.95)
rs1038666	12	29085005	rs11049529	G	A	0.573085	0.609433	0.532294	0.612904	0.553174	0.600546	5.091e-10	0.81 (0.76-0.87)		2.374e-10	0.81 (0.76-0.86)
rs61915977	12	28128075	rs11049529, rs1038666	C	T	0.195787	0.168538	0.199886	0.166491	0.189948	0.16092	1.352e-07	1.27 (1.16-1.38)		1.385e-06	1.24 (1.14-1.36)
rs2127762	12	29018626	rs11049529, rs1038666, rs61915977	G	A	0.349335	0.387025	0.345711	0.384806	0.318677	0.373617	6.974e-07	0.84 (0.78-0.90)		1.148e-05	0.85 (0.80-0.92)
rs118069537	14	51726296	rs11049529	C	T	0.022512	0.01409	0.0175133	0.0138405	0.0175698	0.0177858	0.000583	1.58 (1.22-2.05)		0.0003006	1.62 (1.25-2.10)
rs148315643	14	61772028	rs58255598	A	T	0.0396875	0.0281757	0.0359893	0.0301875	0.0416522	0.0297201	0.000672	1.36 (1.14-1.62)		0.0003677	1.38 (1.16-1.65)
rs11852633	15	88734346	rs189646742	T	C	0.142684	0.116257	0.136306	0.12183	0.121703	0.12047	0.00126	1.17 (1.06-1.29)		0.001602	1.17 (1.06-1.29)
rs79714557	16	70609997	rs376989376	A	T	0.0608472	0.0732302	0.0609905	0.0735409	0.0633008	0.0679784	0.000437	0.71 (0.58-0.86)		0.0002951	0.70 (0.58-0.85)
rs553380513	20	8305550	rs6140442	T	C	0.0117094	0.00445444	0.00442179	0.0059359	0.00796407	0.00667642	0.000315	2.08 (1.40-3.09)		0.0001715	2.15 (1.44-3.20)
CHR, chromosome; REF, reference; ALT, alternative; GWAS, genome wide association study; OR, odds ratio; CI, confidence interval.
