# Supplementary material for: Genetic insights into ossification of the posterior longitudinal ligament of the spine
Source: eLife. 2023 Jul 18;12:e86514. doi: 10.7554/eLife.86514 (PMC10353864; doi:10.7554/eLife.86514)
Supplement: Supplementary file 3. [file elife-86514-supp3.xlsx]

## Sheet: ST3
Supplementaly Table 3. Functional annotation of SNPs correlated with previously unreported OPLL signals (r2 > 0.8)
SNP	Lead SNP	r2	CHR	Position (hg19)	REF	ALT	P	OR	ALT allele frequency							HaploReg							RegulomeDB Score	Gene	Position
									GWAS set 1		GWAS set 2		GWAS set 3			Histone mark		DNase	Protein bound	Motif changed	Selected eQTL hit
									Case	Control	Case	Control	Case	Control		Promoter	Enhancer
rs4665972	rs4665972	1	2	27598097	T	C	7.01e-09	1.23(1.15-1.32)	0.482984	0.432653	0.473544	0.424516	0.441369	0.4297			IPSC			Ik-1,ZBRK1	Y		4	SNX17	intronic
rs2513237	rs35505248	0.807787	11	86780864	A	G	4.88e-08	0.83(0.77-0.89)	0.616152	0.657556	0.593597	0.64934	0.600336	0.639972						4 altered motifs	N		6	TMEM135	intronic
rs2512494	rs35505248	0.920509	11	86826749	T	A	2.55e-09	0.81(0.76-0.87)	0.640682	0.678553	0.605983	0.671079	0.613332	0.661309			FAT			Hoxb6,Nkx3,Pou5f1	N		5	TMEM135	intronic
rs2512495	rs35505248	0.948229	11	86826934	T	A	2.31e-09	0.81(0.76-0.87)	0.633999	0.672688	0.601394	0.666161	0.61017	0.656238			FAT			11 altered motifs	N		5	TMEM135	intronic
rs2512496	rs35505248	0.948837	11	86826963	G	A	3.13e-09	0.81(0.76-0.87)	0.634804	0.672746	0.601395	0.666163	0.61017	0.656239			FAT			5 altered motifs	N		5	TMEM135	intronic
rs5793237	rs35505248	0.949994	11	86827617	TTGA	T	2.69e-09	1.23(1.15-1.32)	0.360425	0.322327	0.396003	0.330888	0.377608	0.330854			FAT			19 altered motifs	N		5	TMEM135	intronic
rs2445560	rs35505248	0.950603	11	86827825	C	G	3.01e-09	0.81(0.76-0.87)	0.634849	0.672753	0.601389	0.666161	0.609553	0.65615						11 altered motifs	N		6	TMEM135	intronic
rs2451065	rs35505248	0.950024	11	86827946	C	T	2.5e-09	0.81(0.76-0.87)	0.634849	0.673013	0.601389	0.666236	0.609557	0.656383						ERalpha-a,GATA,Zbtb3	N		5	TMEM135	intronic
rs2451064	rs35505248	0.949994	11	86828153	G	A	2.95e-09	0.81(0.76-0.87)	0.634737	0.672683	0.601324	0.666111	0.609522	0.656101						10 altered motifs	N		4	TMEM135	intronic
rs2451063	rs35505248	0.950603	11	86828228	G	A	3.01e-09	0.81(0.76-0.87)	0.634849	0.672753	0.601389	0.666161	0.609553	0.65615			GI			CDP,GATA,Pou2f2	N		4	TMEM135	intronic
rs2451062	rs35505248	0.950603	11	86828686	T	C	3.01e-09	0.81(0.76-0.87)	0.634849	0.672753	0.601389	0.666161	0.609553	0.65615			GI			7 altered motifs	N		6	TMEM135	intronic
rs2445561	rs35505248	0.950603	11	86828786	G	T	3.02e-09	0.81(0.76-0.87)	0.634863	0.672756	0.601389	0.666163	0.609555	0.656151			GI				N		7	TMEM135	intronic
rs2451061	rs35505248	0.950603	11	86830485	G	A	2.91e-09	0.81(0.76-0.87)	0.634871	0.672758	0.601393	0.666165	0.609882	0.656853			4 tissues				N		5	TMEM135	intronic
rs3018710	rs35505248	0.950603	11	86830715	C	T	2.9e-09	0.81(0.76-0.87)	0.634863	0.672756	0.601389	0.666163	0.609873	0.656851			5 tissues				N		7	TMEM135	intronic
rs3018709	rs35505248	0.949994	11	86830772	G	C	2.88e-09	0.81(0.76-0.87)	0.634783	0.672714	0.601373	0.666122	0.609866	0.656767			5 tissues			4 altered motifs	N		7	TMEM135	intronic
rs3103386	rs35505248	0.950603	11	86830793	A	G	2.89e-09	0.81(0.76-0.87)	0.634875	0.672765	0.601397	0.666175	0.609886	0.656863			5 tissues			9 altered motifs	N		6	TMEM135	intronic
rs3133320	rs35505248	0.949994	11	86830909	T	C	3.32e-09	0.81(0.76-0.87)	0.634763	0.672751	0.601365	0.666021	0.611269	0.656844			ESC, LIV				N		7	TMEM135	intronic
rs36029875	rs35505248	0.884759	11	86830925	T	G	8.66e-09	0.82(0.76-0.88)	0.60085	0.639047	0.565983	0.634052	0.588633	0.623306			ESC, LIV			6 altered motifs	N		6	TMEM135	intronic
rs35505248	rs35505248	1	11	86830927	T	A	6.75e-10	0.81(0.75-0.86)	0.623852	0.66523	0.594221	0.659285	0.604145	0.649234			ESC, LIV			8 altered motifs	N		6	TMEM135	intronic
rs3133321	rs35505248	0.949994	11	86831635	T	C	2.46e-09	0.81(0.76-0.87)	0.634635	0.67261	0.600547	0.665659	0.60986	0.656794						BCL	N		5	TMEM135	intronic
rs660246	rs35505248	0.950603	11	86832576	A	T	2.58e-09	0.81(0.76-0.87)	0.634825	0.672675	0.600571	0.665674	0.609873	0.656849						Mef2	N		5	TMEM135	intronic
rs483548	rs35505248	0.950603	11	86832604	T	G	2.59e-09	0.81(0.76-0.87)	0.634838	0.672678	0.600571	0.665675	0.609873	0.656851						15 altered motifs	N		5	TMEM135	intronic
rs488227	rs35505248	0.950603	11	86833101	G	A	2.58e-09	0.81(0.76-0.87)	0.634826	0.672676	0.600571	0.665674	0.609885	0.656857							N		5	TMEM135	intronic
rs1829359	rs35505248	0.948807	11	86833562	T	G	2.97e-09	0.81(0.76-0.87)	0.635462	0.672966	0.601412	0.665995	0.60985	0.65726						4 altered motifs	N		3a	TMEM135	intronic
rs1829360	rs35505248	0.948807	11	86833565	T	C	2.97e-09	0.81(0.76-0.87)	0.635462	0.672966	0.601412	0.665995	0.60985	0.65726						5 altered motifs	N		3a	TMEM135	intronic
rs1829362	rs35505248	0.949994	11	86833728	T	C	2.59e-09	0.81(0.76-0.87)	0.634823	0.672665	0.60057	0.665672	0.60987	0.656846						5 altered motifs	N		3a	TMEM135	intronic
rs518489	rs35505248	0.950603	11	86834117	T	C	2.61e-09	0.81(0.76-0.87)	0.634817	0.672631	0.60055	0.665655	0.609819	0.656819						4 altered motifs	N		4	TMEM135	intronic
rs35903615	rs35505248	0.948778	11	86834313	C	CCTT	2.72e-09	0.81(0.76-0.87)	0.634736	0.672512	0.600526	0.665473	0.609674	0.656628							N		5	TMEM135	intronic
rs35728847	rs35505248	0.948778	11	86834319	G	T	2.7e-09	0.81(0.76-0.87)	0.634757	0.672546	0.600552	0.665509	0.609693	0.656655						Hsf,LUN-1	N		5	TMEM135	intronic
rs34976066	rs35505248	0.949994	11	86834623	T	TTG	2.18e-09	1.23(1.15-1.32)	0.360357	0.322225	0.396595	0.331085	0.378942	0.331678			BRN			CDP,Pou2f2,Sox	N		5	TMEM135	intronic
rs2512342	rs35505248	0.950024	11	86835175	C	T	2.55e-09	0.81(0.76-0.87)	0.63485	0.672719	0.600597	0.665691	0.609885	0.65687			ESC, BRN, PANC	BLD		Evi-1,Pax-6	N		5	TMEM135	intronic
rs2512343	rs35505248	0.950603	11	86835260	G	T	2.59e-09	0.81(0.76-0.87)	0.634838	0.672678	0.600571	0.665675	0.609873	0.656851			ESC, SKIN, BRN			4 altered motifs	N		5	TMEM135	intronic
rs2512344	rs35505248	0.949446	11	86835374	A	G	2.15e-09	0.81(0.76-0.87)	0.638837	0.677023	0.602629	0.668284	0.609898	0.65708			ESC, SKIN, BRN	IPSC		16 altered motifs	N		3a	TMEM135	intronic
rs692857	rs35505248	0.950603	11	86835475	G	A	2.59e-09	0.81(0.76-0.87)	0.634838	0.672678	0.600571	0.665675	0.609873	0.656851			4 tissues			Evi-1	N		3a	TMEM135	intronic
rs597344	rs35505248	0.947621	11	86835679	A	T	2.96e-09	0.81(0.76-0.87)	0.634675	0.672286	0.60017	0.665199	0.609685	0.656468			SKIN, BRN, MUS			4 altered motifs	N		5	TMEM135	intronic
rs597406	rs35505248	0.945195	11	86835722	G	A	2.51e-09	0.81(0.76-0.87)	0.633741	0.671716	0.600166	0.664693	0.607956	0.656088			SKIN, BRN, MUS			AP-3,Maf,STAT	N		5	TMEM135	intronic
rs563019	rs35505248	0.934927	11	86836408	G	A	3.21e-09	0.81(0.76-0.87)	0.62929	0.667505	0.592632	0.657614	0.606237	0.651568			7 tissues	7 tissues	CEBPB,P300	Ets,UF1H3BETA	N		4	TMEM135	intronic
rs564877	rs35505248	0.935552	11	86836625	G	A	3.19e-09	0.81(0.76-0.87)	0.62942	0.667655	0.592769	0.657767	0.606412	0.651725			6 tissues	5 tissues	P300		N		4	TMEM135	intronic
rs2932120	rs35505248	0.935552	11	86836692	G	A	3.19e-09	0.81(0.76-0.87)	0.62942	0.667655	0.592769	0.657767	0.606413	0.651725			6 tissues	THYM,BRST,BRN		Nkx3,PLZF	N		4	TMEM135	intronic
rs612523	rs35505248	0.934389	11	86836785	G	A	2.74e-09	0.81(0.76-0.87)	0.6295	0.667879	0.592813	0.658015	0.606423	0.651896			6 tissues	ESDR,BRST,BRN		CIZ,Ik-1,Ik-2	N		5	TMEM135	intronic
rs34601982	rs35505248	0.935552	11	86837184	G	GA	3.19e-09	0.81(0.76-0.87)	0.62942	0.667655	0.592769	0.657767	0.606413	0.651726			4 tissues			Pitx2	N		5	TMEM135	intronic
rs487370	rs35505248	0.934358	11	86837865	A	C	3.51e-09	0.81(0.76-0.87)	0.628945	0.667324	0.592717	0.657277	0.606497	0.651331			ESDR, BRN			8 altered motifs	N		7	TMEM135	intronic
rs628686	rs35505248	0.934373	11	86838100	T	C	3.38e-09	0.81(0.76-0.87)	0.629313	0.667537	0.592715	0.657742	0.607017	0.651718			5 tissues			9 altered motifs	N		4	TMEM135	intronic
rs655050	rs35505248	0.935552	11	86839381	T	C	2.78e-09	0.81(0.76-0.87)	0.633394	0.671958	0.598522	0.664292	0.606413	0.651726			5 tissues			AP-1,Nanog,SPIB	N		4	TMEM135	intronic
rs655907	rs35505248	0.935552	11	86839536	G	T	3.22e-09	0.81(0.76-0.87)	0.629359	0.667578	0.592769	0.657767	0.606413	0.651726			4 tissues	LIV,BLD	4 bound proteins	Gfi1b,HNF1,NF-E2	N		4	TMEM135	intronic
rs754032566	rs35505248	0.934358	11	86839947	T	TAC	3.06e-09	1.23(1.15-1.31)	0.365818	0.327517	0.398484	0.333598	0.38238	0.336828							N		5	TMEM135	intronic
11-86840057	rs35505248	0.935552	11	86840057	G	GT	2.82e-09	1.23(1.15-1.31)	0.365799	0.327262	0.398448	0.333299	0.382371	0.336787							N		5	TMEM135	intronic
rs491895	rs35505248	0.93497	11	86840098	G	C	3.2e-09	0.81(0.76-0.87)	0.629392	0.667663	0.592932	0.657827	0.606455	0.651778						HDAC2,RP58	N		5	TMEM135	intronic
rs2512338	rs35505248	0.93497	11	86840718	A	G	3.19e-09	0.81(0.76-0.87)	0.629367	0.667596	0.592771	0.657774	0.606415	0.651754						LUN-1	N		5	TMEM135	intronic
rs60438604	rs35505248	0.934955	11	86840973	T	TA	2.82e-09	1.23(1.15-1.31)	0.365802	0.327299	0.398517	0.333314	0.382386	0.336846						13 altered motifs	N		6	TMEM135	intronic
rs595930	rs35505248	0.934373	11	86841969	C	T	3.29e-09	0.81(0.76-0.87)	0.629382	0.667564	0.592692	0.65776	0.607047	0.651938						8 altered motifs	N		5	TMEM135	intronic
rs150087331	rs35505248	0.93318	11	86842383	A	AATCCCCTGTGCTCTACCTATTC	3.21e-09	0.81(0.76-0.87)	0.629283	0.667506	0.592608	0.657609	0.606385	0.651649						BDP1,NF-kappaB,RXRA	N		7	TMEM135	intronic
rs11234985	rs35505248	0.933777	11	86842411	C	G	3.27e-09	0.81(0.76-0.87)	0.629344	0.667525	0.592633	0.657632	0.606395	0.651673						Pou2f2	N		5	TMEM135	intronic
rs502165	rs35505248	0.934373	11	86842783	C	A	3.22e-09	0.81(0.76-0.87)	0.629359	0.667546	0.592685	0.657716	0.60641	0.651726							N		6	TMEM135	intronic
rs502079	rs35505248	0.931989	11	86842812	T	C	3.34e-09	0.81(0.76-0.87)	0.629127	0.666988	0.591947	0.657298	0.606303	0.651365			VAS				N		5	TMEM135	intronic
rs609914	rs35505248	0.932584	11	86842813	G	A	2.96e-09	0.81(0.76-0.87)	0.629005	0.667209	0.591959	0.657459	0.606348	0.651398			VAS			CDP	N		5	TMEM135	intronic
rs500312	rs35505248	0.932003	11	86842992	A	G	2.46e-09	0.81(0.76-0.87)	0.6289	0.667019	0.591042	0.657587	0.606564	0.651164			VAS			5 altered motifs	N		4	TMEM135	intronic
rs496671	rs35505248	0.933791	11	86843374	A	G	3.22e-09	0.81(0.76-0.87)	0.629359	0.667576	0.592685	0.657751	0.606574	0.651726						23 altered motifs	N		5	TMEM135	intronic
11-86843865	rs35505248	0.933791	11	86843865	G	GT	2.82e-09	1.23(1.15-1.31)	0.365787	0.327261	0.398529	0.333311	0.38221	0.336788							N		5	TMEM135	intronic
rs7949278	rs35505248	0.933195	11	86844422	C	A	3.35e-09	0.81(0.76-0.87)	0.629345	0.667555	0.592669	0.657735	0.60722	0.652121						Sin3Ak-20	N		7	TMEM135	intronic
rs7949665	rs35505248	0.93321	11	86844578	G	C	3.52e-09	0.81(0.76-0.87)	0.629786	0.667759	0.5927	0.657856	0.607428	0.652371							N		6	TMEM135	intronic
rs36070851	rs35505248	0.933791	11	86844841	C	CT	2.96e-09	1.23(1.15-1.31)	0.365786	0.32726	0.398529	0.333311	0.382553	0.337475						GATA,HDAC2	N		6	TMEM135	intronic
rs550988	rs35505248	0.93321	11	86844886	A	T	3.3e-09	0.81(0.76-0.87)	0.629375	0.667597	0.592692	0.657773	0.607395	0.652359						8 altered motifs	N		6	TMEM135	intronic
rs2512339	rs35505248	0.930307	11	86846550	A	T	5.85e-09	0.82(0.76-0.87)	0.630922	0.668707	0.596171	0.659407	0.609097	0.653969						6 altered motifs	N		6	TMEM135	intronic
rs487678	rs35505248	0.933791	11	86847185	T	C	3.09e-09	0.81(0.76-0.87)	0.628657	0.667125	0.592854	0.65776	0.60738	0.652325			SKIN	MUS			N		5	TMEM135	intronic
11-86847703	rs35505248	0.86114	11	86847703	C	CT	1.21e-09	1.24(1.16-1.32)	0.380433	0.339868	0.414018	0.346089	0.384785	0.350058							N		5	TMEM135	intronic
rs628447	rs35505248	0.933791	11	86848358	G	T	3.09e-09	0.81(0.76-0.87)	0.628657	0.667125	0.592854	0.65776	0.60738	0.652325			FAT, SKIN, GI			8 altered motifs	N		4	TMEM135	intronic
rs543915	rs35505248	0.933791	11	86848478	T	C	3.09e-09	0.81(0.76-0.87)	0.628657	0.667125	0.592854	0.65776	0.60738	0.652325			FAT, SKIN, GI	SKIN		14 altered motifs	N		5	TMEM135	intronic
11-86848712	rs35505248	0.871448	11	86848712	AT	A	3.73e-09	1.23(1.15-1.31)	0.377431	0.339166	0.408365	0.343278	0.391053	0.350048							N		5	TMEM135	intronic
rs630249	rs35505248	0.933791	11	86848756	G	A	3.09e-09	0.81(0.76-0.87)	0.628657	0.667126	0.592854	0.65776	0.607382	0.652326			FAT, SKIN, GI	ESDR,BRN,LNG		HDAC2,HMG-IY	N		5	TMEM135	intronic
rs538494	rs35505248	0.932599	11	86849091	G	A	3.44e-09	0.81(0.76-0.87)	0.628546	0.666959	0.592799	0.657516	0.607248	0.651865			FAT, SKIN	7 tissues		FXR,Foxo,GATA	N		3a	TMEM135	intronic
rs643145	rs35505248	0.931395	11	86849397	C	T	3.7e-09	0.81(0.76-0.87)	0.628519	0.666908	0.592564	0.65745	0.607966	0.65188			FAT, SKIN			NRSF	N		5	TMEM135	intronic
rs643175	rs35505248	0.931989	11	86849413	T	G	3.64e-09	0.81(0.76-0.87)	0.628561	0.666973	0.592583	0.657505	0.60802	0.651938			FAT, SKIN			4 altered motifs	N		5	TMEM135	intronic
rs535515	rs35505248	0.932585	11	86849451	T	C	3.86e-09	0.81(0.76-0.87)	0.628875	0.666951	0.592522	0.657563	0.608134	0.652414			FAT, SKIN			8 altered motifs	N		5	TMEM135	intronic
rs644083	rs35505248	0.933762	11	86849633	T	A	3.2e-09	0.81(0.76-0.87)	0.62866	0.667107	0.592857	0.657692	0.607382	0.652325			SKIN	GI		8 altered motifs	N		5	TMEM135	intronic
rs644457	rs35505248	0.93318	11	86849686	A	G	3.26e-09	0.81(0.76-0.87)	0.628808	0.667146	0.592955	0.657779	0.607412	0.652446			SKIN			Arid5b,Irf	N		7	TMEM135	intronic
rs483373	rs35505248	0.93318	11	86850483	C	T	3e-09	0.81(0.76-0.87)	0.628674	0.667714	0.594138	0.658165	0.607385	0.652677						6 altered motifs	N		3a	TMEM135	intronic
rs2247537	rs35505248	0.933762	11	86850705	G	A	3.2e-09	0.81(0.76-0.87)	0.628657	0.667106	0.592854	0.657691	0.60738	0.652323					SETDB1	E2F,ZBTB33	N		4	TMEM135	intronic
rs2512350	rs35505248	0.933762	11	86850736	A	G	3.2e-09	0.81(0.76-0.87)	0.628657	0.667106	0.592854	0.657691	0.607382	0.652324					SETDB1	YY1	N		3a	TMEM135	intronic
rs672194	rs35505248	0.933762	11	86851267	G	A	3.2e-09	0.81(0.76-0.87)	0.628657	0.667106	0.592854	0.657691	0.607383	0.652325						CACD,NRSF	N		7	TMEM135	intronic
rs672269	rs35505248	0.933762	11	86851316	A	G	3.2e-09	0.81(0.76-0.87)	0.628657	0.667106	0.592854	0.657691	0.60738	0.652323						STAT	N		7	TMEM135	intronic
rs687244	rs35505248	0.933167	11	86852333	G	A	2.62e-09	0.81(0.76-0.87)	0.627944	0.666905	0.592851	0.657193	0.606004	0.65203						4 altered motifs	N		7	TMEM135	intronic
rs687651	rs35505248	0.933762	11	86852427	G	T	3.18e-09	0.81(0.76-0.87)	0.628657	0.667106	0.592854	0.657691	0.607541	0.652537						Foxo,Zfp105	N		7	TMEM135	intronic
rs499388	rs35505248	0.933762	11	86852569	T	G	3.18e-09	0.81(0.76-0.87)	0.628657	0.667106	0.592854	0.657691	0.607541	0.652537				SKIN		4 altered motifs	N		3a	TMEM135	intronic
rs688542	rs35505248	0.933762	11	86852593	G	A	3.18e-09	0.81(0.76-0.87)	0.628657	0.667106	0.592854	0.657691	0.607541	0.652537				SKIN		15 altered motifs	N		3a	TMEM135	intronic
rs497592	rs35505248	0.933762	11	86852758	A	G	3.18e-09	0.81(0.76-0.87)	0.628657	0.667106	0.592854	0.657691	0.607541	0.652537			SKIN	IPSC		4 altered motifs	N		6	TMEM135	intronic
rs581833	rs35505248	0.933762	11	86852877	A	T	3.18e-09	0.81(0.76-0.87)	0.628657	0.667106	0.592854	0.657691	0.607541	0.652537			SKIN			7 altered motifs	N		6	TMEM135	intronic
rs593243	rs35505248	0.933762	11	86853125	T	G	3.18e-09	0.81(0.76-0.87)	0.628657	0.667106	0.592854	0.657691	0.607541	0.652537			6 tissues	ESDR,THYM		PLZF	N		4	TMEM135	intronic
rs492211	rs35505248	0.933167	11	86853282	G	A	4.02e-09	0.81(0.76-0.87)	0.628648	0.666488	0.59285	0.657293	0.607539	0.652395			8 tissues	4 tissues		Maf	N		3a	TMEM135	intronic
11-86853864	rs35505248	0.9239	11	86853864	CTCT	C	5.47e-09	1.22(1.14-1.31)	0.364301	0.324812	0.393042	0.330613	0.376966	0.3355							N		5	TMEM135	intronic
rs597319	rs35505248	0.930219	11	86853997	A	G	3.28e-09	0.81(0.76-0.87)	0.62861	0.666939	0.592642	0.657592	0.615386	0.660772			4 tissues			Pou2f2	N		5	TMEM135	intronic
rs608533	rs35505248	0.930219	11	86854217	C	G	3.12e-09	0.81(0.76-0.87)	0.628595	0.66703	0.592638	0.657581	0.607455	0.652447			BLD, SKIN, LIV			9 altered motifs	N		5	TMEM135	intronic
rs608870	rs35505248	0.930219	11	86854250	C	T	3.12e-09	0.81(0.76-0.87)	0.628595	0.66703	0.592638	0.657581	0.607455	0.652447			BLD, SKIN, LIV			11 altered motifs	N		5	TMEM135	intronic
rs608966	rs35505248	0.929625	11	86854309	G	C	3.17e-09	0.81(0.76-0.87)	0.628622	0.667049	0.592675	0.657614	0.607554	0.652469			BLD, SKIN, LIV			5 altered motifs	N		4	TMEM135	intronic
rs609819	rs35505248	0.929032	11	86854505	T	A	3.05e-09	0.81(0.76-0.87)	0.628591	0.666969	0.592296	0.657523	0.607465	0.652264			BLD, SKIN, LIV	THYM		GR,TATA	N		7	TMEM135	intronic
rs610228	rs35505248	0.928461	11	86854595	G	T	3.18e-09	0.81(0.76-0.87)	0.628667	0.667098	0.592704	0.657658	0.607786	0.652574			BLD, SKIN, LIV	THYM		Mtf1,p300	N		5	TMEM135	intronic
rs611523	rs35505248	0.929625	11	86854857	G	T	3.17e-09	0.81(0.76-0.87)	0.628617	0.667045	0.59267	0.65761	0.607541	0.652461			8 tissues	THYM,BLD		8 altered motifs	N		5	TMEM135	intronic
rs611579	rs35505248	0.929625	11	86854903	C	T	3.17e-09	0.81(0.76-0.87)	0.628617	0.667045	0.59267	0.657611	0.607541	0.652461			8 tissues	THYM,LIV			N		5	TMEM135	intronic
rs541998	rs35505248	0.929625	11	86855296	G	A	3.17e-09	0.81(0.76-0.87)	0.628625	0.667048	0.592672	0.657614	0.607549	0.652466			9 tissues		AP2ALPHA	Pou3f3	N		5	TMEM135	intronic
rs541089	rs35505248	0.929625	11	86855391	A	G	3.13e-09	0.81(0.76-0.87)	0.628465	0.666952	0.592989	0.657911	0.607541	0.652461			9 tissues	THYM,CRVX	AP2ALPHA,FOXA1		N		5	TMEM135	intronic
rs626897	rs35505248	0.929625	11	86856021	G	C	3.13e-09	0.81(0.76-0.87)	0.628465	0.666952	0.592989	0.657911	0.607541	0.652461			BLD, GI, THYM			Maf	N		7	TMEM135	intronic
rs654569	rs35505248	0.929625	11	86856206	C	T	3.13e-09	0.81(0.76-0.87)	0.628475	0.666958	0.592991	0.657915	0.60755	0.652472			BLD, THYM				N		5	TMEM135	intronic
rs655778	rs35505248	0.929625	11	86856437	G	T	3.13e-09	0.81(0.76-0.87)	0.628465	0.666952	0.592989	0.657911	0.607541	0.652461			BLD, THYM			Smad4,Spz1	N		5	TMEM135	intronic
11-86856730	rs35505248	0.92312	11	86856730	AT	A	2.31e-09	1.23(1.15-1.32)	0.367517	0.328393	0.399896	0.334372	0.383574	0.338872							N		3a	TMEM135	intronic
rs486739	rs35505248	0.927847	11	86856763	C	T	2.42e-09	0.81(0.76-0.87)	0.627725	0.66653	0.592073	0.657663	0.607397	0.65192			BLD			HDAC2	N		4	TMEM135	intronic
rs482339	rs35505248	0.929032	11	86857174	C	A	3.17e-09	0.81(0.76-0.87)	0.628447	0.666935	0.592986	0.657877	0.607541	0.652412						7 altered motifs	N		7	TMEM135	intronic
rs670125	rs35505248	0.929625	11	86857447	C	G	3.13e-09	0.81(0.76-0.87)	0.628465	0.666952	0.592989	0.657911	0.607541	0.652461						Nkx2	N		7	TMEM135	intronic
rs568905	rs35505248	0.929625	11	86857498	T	C	3.13e-09	0.81(0.76-0.87)	0.628465	0.666952	0.592989	0.657911	0.607541	0.652461						10 altered motifs	N		6	TMEM135	intronic
rs670857	rs35505248	0.927238	11	86857564	C	A	3.32e-09	0.81(0.76-0.87)	0.628106	0.666173	0.591722	0.657038	0.606953	0.652256						5 altered motifs	N		6	TMEM135	intronic
rs111307209	rs35505248	0.926663	11	86858553	G	GTTACTTT	3.57e-09	0.81(0.76-0.87)	0.628157	0.666415	0.592816	0.657531	0.60742	0.652329			SKIN			26 altered motifs	N		6	TMEM135	intronic
rs687208	rs35505248	0.929625	11	86858868	T	C	3.11e-09	0.81(0.76-0.87)	0.628465	0.666952	0.592989	0.657911	0.607658	0.652629			4 tissues			ERalpha-a,STAT,TLX1::NFIC	N		6	TMEM135	intronic
rs534009	rs35505248	0.929032	11	86859033	T	C	3.24e-09	0.81(0.76-0.87)	0.628435	0.66689	0.592951	0.657735	0.607651	0.652621			6 tissues	MUS		7 altered motifs	N		5	TMEM135	intronic
rs533056	rs35505248	0.929032	11	86859142	T	C	3.12e-09	0.81(0.76-0.87)	0.628434	0.666913	0.592967	0.657881	0.607619	0.652598			6 tissues	12 tissues		CTCFL,E2A,Mrg	N		5	TMEM135	intronic
rs606284	rs35505248	0.929625	11	86860244	C	T	3.11e-09	0.81(0.76-0.87)	0.628465	0.666952	0.592989	0.657911	0.607658	0.652629			6 tissues			4 altered motifs	N		5	TMEM135	intronic
rs477944	rs35505248	0.929625	11	86860509	G	A	3.11e-09	0.81(0.76-0.87)	0.628465	0.666952	0.592989	0.657911	0.607658	0.652629			7 tissues	MUS,VAS		9 altered motifs	N		2c	TMEM135	intronic
rs607619	rs35505248	0.92845	11	86860551	T	G	3.61e-09	0.81(0.76-0.87)	0.628433	0.666867	0.593579	0.65795	0.607658	0.652627			7 tissues	VAS		Bcl6b	N		4	TMEM135	intronic
rs620303	rs35505248	0.928461	11	86861127	C	T	3.26e-09	0.81(0.76-0.87)	0.628532	0.66707	0.593045	0.65798	0.608346	0.652686			FAT, STRM, LIV			Pax-4,SIRT6,Znf143	N		3a	TMEM135	intronic
11-86861257	rs35505248	0.926122	11	86861257	C	CAAA	2.53e-09	1.23(1.15-1.32)	0.366154	0.327057	0.39813	0.333142	0.381765	0.337123							N		6	TMEM135	intronic
rs522439	rs35505248	0.929625	11	86861753	T	A	3.11e-09	0.81(0.76-0.87)	0.628465	0.666952	0.592989	0.657911	0.607658	0.652629			6 tissues	ESDR,GI		Arid5a,GR,HP1-site-factor	N		2c	TMEM135	intronic
rs636159	rs35505248	0.929625	11	86862397	G	T	3.11e-09	0.81(0.76-0.87)	0.628465	0.666952	0.592989	0.657911	0.607658	0.652629		FAT	7 tissues			Ik-2	N		5	TMEM135	intronic
rs576582	rs35505248	0.927846	11	86863374	A	G	3.38e-09	0.81(0.76-0.87)	0.628419	0.666792	0.592934	0.65775	0.607542	0.65244			FAT, STRM				N		7	TMEM135	intronic
rs651961	rs35505248	0.929625	11	86863609	C	T	3.11e-09	0.81(0.76-0.87)	0.628465	0.666952	0.592989	0.657911	0.607658	0.652629			FAT			6 altered motifs	N		5	TMEM135	intronic
rs561397	rs35505248	0.929032	11	86863761	A	G	3.05e-09	0.81(0.76-0.87)	0.628333	0.666869	0.59289	0.657802	0.607641	0.652592			FAT	BLD		AP-1	N		5	TMEM135	intronic
rs566046	rs35505248	0.929625	11	86864277	A	G	3.11e-09	0.81(0.76-0.87)	0.628465	0.666952	0.592989	0.657911	0.607658	0.652629			ESC			TATA,YY1	N		7	TMEM135	intronic
rs482258	rs35505248	0.929043	11	86864892	A	G	3.11e-09	0.81(0.76-0.87)	0.628535	0.666995	0.593001	0.657961	0.607693	0.652654						7 altered motifs	N		6	TMEM135	intronic
rs12280110	rs35505248	0.929625	11	86865952	A	G	3.13e-09	0.81(0.76-0.87)	0.628432	0.667045	0.59351	0.65836	0.607994	0.652819				THYM		6 altered motifs	N		7	TMEM135	intronic
rs603676	rs35505248	0.930813	11	86866109	T	C	2.95e-09	0.81(0.76-0.87)	0.628437	0.66717	0.593511	0.658677	0.609031	0.653222						4 altered motifs	N		3a	TMEM135	intronic
rs604199	rs35505248	0.927867	11	86866260	C	T	3.14e-09	0.81(0.76-0.87)	0.628416	0.667015	0.593492	0.658338	0.607995	0.652826			IPSC			BDP1,GCNF,Nr2f2	N		3a	TMEM135	intronic
rs542678	rs35505248	0.923725	11	86866652	A	G	3.23e-09	0.81(0.76-0.87)	0.627813	0.666081	0.592911	0.657624	0.606175	0.652258			9 tissues	SKIN,BLD		5 altered motifs	N		5	TMEM135	intronic
rs542697	rs35505248	0.924315	11	86866658	A	T	3.71e-09	0.81(0.76-0.87)	0.627825	0.665954	0.592947	0.657267	0.606139	0.652299			9 tissues	SKIN,BLD		Irf,TCF4	N		5	TMEM135	intronic
rs543687	rs35505248	0.929043	11	86866802	G	A	3.13e-09	0.81(0.76-0.87)	0.628458	0.667062	0.59353	0.658381	0.607997	0.65283			5 tissues	6 tissues		4 altered motifs	N		5	TMEM135	intronic
rs618926	rs35505248	0.929625	11	86867252	C	G	3.13e-09	0.81(0.76-0.87)	0.628432	0.667045	0.59351	0.65836	0.607994	0.652819			FAT, LIV			Sox	N		7	TMEM135	intronic
rs563688	rs35505248	0.929032	11	86867479	C	A	3.13e-09	0.81(0.76-0.87)	0.628404	0.667002	0.593465	0.658329	0.607962	0.652776			FAT, LIV, VAS			Pbx3	N		7	TMEM135	intronic
rs632708	rs35505248	0.928439	11	86868033	C	T	3.4e-09	0.81(0.76-0.87)	0.628395	0.666936	0.593424	0.658137	0.607933	0.652746			LIV			5 altered motifs	N		5	TMEM135	intronic
rs576679	rs35505248	0.929032	11	86868071	G	A	3.14e-09	0.81(0.76-0.87)	0.628404	0.666999	0.59346	0.658319	0.607953	0.652767			LIV				N		5	TMEM135	intronic
rs556139	rs35505248	0.929625	11	86868347	C	T	3.13e-09	0.81(0.76-0.87)	0.628432	0.667045	0.59351	0.65836	0.607994	0.652819						4 altered motifs	N		5	TMEM135	intronic
rs531500	rs35505248	0.921947	11	86868727	G	T	1.68e-09	0.81(0.76-0.87)	0.627046	0.665061	0.588996	0.656554	0.606631	0.6518						5 altered motifs	N		7	TMEM135	intronic
rs5793242	rs35505248	0.92136	11	86868732	G	GA	9.16e-10	1.24(1.16-1.32)	0.368767	0.329595	0.403114	0.335571	0.385204	0.338692						4 altered motifs	N		7	TMEM135	intronic
rs5028348	rs35505248	0.920773	11	86868742	A	G	1.11e-09	0.81(0.76-0.87)	0.626146	0.664762	0.58893	0.656461	0.605026	0.651508						4 altered motifs	N		7	TMEM135	intronic
rs495668	rs35505248	0.929032	11	86868965	C	T	3.2e-09	0.81(0.76-0.87)	0.628363	0.666934	0.593443	0.658243	0.607935	0.652749						SREBP	N		5	TMEM135	intronic
rs649693	rs35505248	0.92609	11	86869577	T	C	3.24e-09	0.81(0.76-0.87)	0.628737	0.667312	0.594249	0.658644	0.60765	0.652771						HNF4	N		5	TMEM135	intronic
rs494698	rs35505248	0.929625	11	86870469	G	A	3.13e-09	0.81(0.76-0.87)	0.628432	0.667045	0.59351	0.65836	0.607994	0.652819						AIRE,PLZF	N		7	TMEM135	intronic
rs664398	rs35505248	0.929625	11	86870511	T	C	3.13e-09	0.81(0.76-0.87)	0.628432	0.667045	0.59351	0.65836	0.607999	0.652821						Pbx-1,XBP-1	N		6	TMEM135	intronic
rs580120	rs35505248	0.929625	11	86870848	A	T	3.15e-09	0.81(0.76-0.87)	0.628428	0.667041	0.59351	0.658362	0.608081	0.652823						Sin3Ak-20	N		7	TMEM135	intronic
rs513662	rs35505248	0.930813	11	86872104	A	G	2.89e-09	0.81(0.76-0.87)	0.628428	0.667197	0.593548	0.658723	0.609036	0.653223						9 altered motifs	N		5	TMEM135	intronic
rs511694	rs35505248	0.929032	11	86872365	G	A	2.61e-09	0.81(0.76-0.87)	0.628143	0.667007	0.593171	0.658342	0.607994	0.65277						HMG-IY,RXRA	N		7	TMEM135	intronic
rs546229	rs35505248	0.930813	11	86872504	C	T	2.89e-09	0.81(0.76-0.87)	0.628428	0.667197	0.593548	0.658722	0.609031	0.653222						6 altered motifs	N		7	TMEM135	intronic
rs547867	rs35505248	0.929625	11	86872647	G	T	3.06e-09	0.81(0.76-0.87)	0.628423	0.667072	0.593546	0.658405	0.607994	0.652819			STRM, HRT, BONE			16 altered motifs	N		5	TMEM135	intronic
rs549932	rs35505248	0.929625	11	86872908	T	C	2.62e-09	0.81(0.76-0.87)	0.632486	0.671622	0.598522	0.663945	0.607994	0.652819			4 tissues	MUS		4 altered motifs	N		5	TMEM135	intronic
rs577329	rs35505248	0.929032	11	86873570	G	A	3.13e-09	0.81(0.76-0.87)	0.628355	0.667013	0.593485	0.658337	0.60796	0.652598						ERalpha-a	N		7	TMEM135	intronic
rs57024158	rs35505248	0.929032	11	86876396	G	A	3.05e-09	0.81(0.76-0.87)	0.628272	0.66691	0.593401	0.658245	0.607871	0.652718						8 altered motifs	N		6	TMEM135	intronic
rs4514446	rs35505248	0.927847	11	86876828	G	A	3.2e-09	0.81(0.76-0.87)	0.628038	0.666444	0.592555	0.657615	0.6076	0.652296						7 altered motifs	N		7	TMEM135	intronic
rs4451756	rs35505248	0.927847	11	86876848	T	G	3.2e-09	0.81(0.76-0.87)	0.628038	0.666444	0.592555	0.657615	0.6076	0.652296						5 altered motifs	N		6	TMEM135	intronic
11-86876899	rs35505248	0.916682	11	86876899	GA	G	2.16e-09	1.23(1.15-1.32)	0.36882	0.330429	0.401764	0.336025	0.386535	0.340075							N		6	TMEM135	intronic
rs4514447	rs35505248	0.928429	11	86877016	G	A	3.13e-09	0.81(0.76-0.87)	0.628245	0.666858	0.593328	0.658192	0.607887	0.652615						Foxq1	N		7	TMEM135	intronic
rs4604911	rs35505248	0.927847	11	86877051	T	C	3.04e-09	0.81(0.76-0.87)	0.628245	0.666896	0.593371	0.658251	0.607863	0.652659						5 altered motifs	N		7	TMEM135	intronic
rs4635105	rs35505248	0.929625	11	86877117	A	C	3.04e-09	0.81(0.76-0.87)	0.628375	0.667032	0.593507	0.658369	0.608005	0.652815						AFP1,PU.1,p300	N		7	TMEM135	intronic
rs561778	rs35505248	0.929625	11	86877666	G	T	3.06e-09	0.81(0.76-0.87)	0.628422	0.667071	0.593541	0.658404	0.608027	0.652839						Foxp3,RREB-1	N		7	TMEM135	intronic
rs607894	rs35505248	0.929625	11	86877716	T	C	3.06e-09	0.81(0.76-0.87)	0.628419	0.667065	0.593532	0.658397	0.608022	0.652835							N		6	TMEM135	intronic
11-86877799	rs35505248	0.929625	11	86877799	C	CT	2.67e-09	1.23(1.15-1.32)	0.366521	0.327443	0.398559	0.333689	0.38224	0.337402							N		6	TMEM135	intronic
rs484135	rs35505248	0.929625	11	86878332	G	C	3.06e-09	0.81(0.76-0.87)	0.628423	0.667072	0.593546	0.658405	0.607994	0.652819						Nkx2,Nkx3	N		5	TMEM135	intronic
rs479593	rs35505248	0.922091	11	86878421	T	C	3.59e-09	0.81(0.76-0.87)	0.630531	0.668501	0.59531	0.660057	0.607781	0.653705						4 altered motifs	N		5	TMEM135	intronic
rs484403	rs35505248	0.930813	11	86878971	T	C	2.81e-09	0.81(0.76-0.87)	0.628434	0.667222	0.593576	0.658737	0.608675	0.652995						Eomes,Mrg1::Hoxa9,Pax-6	N		6	TMEM135	intronic
rs511755	rs35505248	0.929625	11	86879011	T	C	2.97e-09	0.81(0.76-0.87)	0.628429	0.667097	0.593574	0.65842	0.60764	0.652592						26 altered motifs	N		6	TMEM135	intronic
rs509277	rs35505248	0.928439	11	86879342	C	T	3.09e-09	0.81(0.76-0.87)	0.628379	0.666976	0.593507	0.658305	0.607508	0.652485						Elf5,GATA,STAT	N		7	TMEM135	intronic
rs540403	rs35505248	0.929625	11	86880458	G	A	2.97e-09	0.81(0.76-0.87)	0.628423	0.667072	0.593546	0.658405	0.60757	0.652574						4 altered motifs	N		5	TMEM135	intronic
rs652171	rs35505248	0.922091	11	86880711	T	C	3.59e-09	0.81(0.76-0.87)	0.630531	0.668501	0.59531	0.660057	0.607781	0.653705						4 altered motifs	N		5	TMEM135	intronic
rs653519	rs35505248	0.922091	11	86881007	A	G	3.59e-09	0.81(0.76-0.87)	0.630531	0.668501	0.59531	0.660057	0.607781	0.653705			IPSC				N		5	TMEM135	intronic
11-86881050	rs35505248	0.923248	11	86881050	C	CT	2.62e-09	1.23(1.15-1.32)	0.364569	0.326355	0.3973	0.332178	0.383411	0.33592							N		5	TMEM135	intronic
rs654485	rs35505248	0.922091	11	86881246	T	C	3.59e-09	0.81(0.76-0.87)	0.630531	0.668501	0.59531	0.660057	0.607781	0.653705						Foxp1,Sin3Ak-20	N		7	TMEM135	intronic
rs570716	rs35505248	0.929043	11	86881464	G	T	2.92e-09	0.81(0.76-0.87)	0.628475	0.667202	0.593782	0.658494	0.607579	0.652627			THYM			Sox,TATA	N		7	TMEM135	intronic
rs572433	rs35505248	0.921512	11	86881621	C	T	2.52e-09	0.81(0.76-0.87)	0.629784	0.668382	0.595443	0.660283	0.607796	0.653898			4 tissues				N		5	TMEM135	intronic
rs492896	rs35505248	0.925555	11	86882043	G	A	3.38e-09	0.81(0.76-0.87)	0.628642	0.667541	0.59452	0.65909	0.608612	0.652951			HRT			PLAG1	N		5	TMEM135	intronic
rs552521	rs35505248	0.92611	11	86882599	C	A	2.76e-09	0.81(0.76-0.87)	0.62793	0.667189	0.594403	0.658799	0.607592	0.652866			BLD				N		7	TMEM135	intronic
rs555190	rs35505248	0.918584	11	86882874	T	C	3.36e-09	0.81(0.76-0.87)	0.630049	0.668612	0.596164	0.660438	0.607797	0.654003			MUS, BLD			Sox	N		5	TMEM135	intronic
rs495238	rs35505248	0.92611	11	86882981	A	G	2.76e-09	0.81(0.76-0.87)	0.62793	0.667189	0.594403	0.658799	0.607592	0.652866			MUS, BLD			TLX1::NFIC,Zfx	N		5	TMEM135	intronic
rs520755	rs35505248	0.92611	11	86883454	A	G	2.76e-09	0.81(0.76-0.87)	0.62793	0.667189	0.594403	0.658799	0.607592	0.652866						4 altered motifs	N		5	TMEM135	intronic
rs476597	rs35505248	0.92611	11	86884018	C	T	2.76e-09	0.81(0.76-0.87)	0.62793	0.667189	0.594403	0.658799	0.607592	0.652866			FAT, LNG, VAS			Nkx3,Pou2f2,Sox	N		5	TMEM135	intronic
rs502580	rs35505248	0.925529	11	86884532	G	T	2.62e-09	0.81(0.76-0.87)	0.628008	0.667363	0.594811	0.659089	0.607605	0.653094		LNG	17 tissues	26 tissues	8 bound proteins	MIF-1	N		4	TMEM135	intronic
rs603140	rs35505248	0.92611	11	86884615	G	A	2.76e-09	0.81(0.76-0.87)	0.62793	0.667189	0.594403	0.658799	0.607592	0.652866		VAS	15 tissues	19 tissues	7 bound proteins	Cart1	N		4	TMEM135	intronic
rs604035	rs35505248	0.92611	11	86884825	C	G	2.76e-09	0.81(0.76-0.87)	0.62793	0.667189	0.594403	0.658799	0.607592	0.652866		SKIN, LNG	16 tissues	6 tissues	5 bound proteins	Pbx3	N		4	TMEM135	intronic
rs606299	rs35505248	0.92611	11	86885342	T	C	2.77e-09	0.81(0.76-0.87)	0.62793	0.667189	0.594403	0.658799	0.607575	0.652848			15 tissues			Pou5f1	N		7	TMEM135	intronic
rs2512490	rs35505248	0.92611	11	86886175	T	G	2.77e-09	0.81(0.76-0.87)	0.62793	0.667189	0.594403	0.658799	0.607575	0.652848			10 tissues	BLD		12 altered motifs	N		3a	TMEM135	intronic
rs2451060	rs35505248	0.92611	11	86886408	C	T	2.77e-09	0.81(0.76-0.87)	0.62793	0.667189	0.594403	0.658799	0.607575	0.652848			7 tissues	LIV		5 altered motifs	N		3a	TMEM135	intronic
rs565869	rs35505248	0.92611	11	86886904	A	C	2.77e-09	0.81(0.76-0.87)	0.62793	0.667189	0.594403	0.658799	0.607575	0.652848			6 tissues				N		5	TMEM135	intronic
rs634277	rs35505248	0.92611	11	86887931	A	G	2.79e-09	0.81(0.76-0.87)	0.627981	0.667199	0.59441	0.658809	0.607407	0.652698			CRVX			8 altered motifs	N		5	TMEM135	intronic
rs7138350	rs35281060	0.843682	12	19967091	C	T	2.82e-10	1.24(1.16-1.32)	0.489486	0.44938	0.496859	0.446728	0.497635	0.424219						5 altered motifs	N		5	AEBP2, LINC02398	intergenic
rs117180159	rs35281060	0.995742	12	19970752	A	G	2.01e-12	1.27(1.19-1.36)	0.540919	0.49263	0.543876	0.489715	0.547313	0.470434							N		7	AEBP2, LINC02398	intergenic
rs11044883	rs35281060	0.995744	12	19971132	G	C	2.27e-12	1.27(1.19-1.36)	0.540483	0.492541	0.543935	0.48972	0.54727	0.47005				CRVX		6 altered motifs	N		5	AEBP2, LINC02398	intergenic
rs4762815	rs35281060	0.843682	12	19971510	C	G	2.73e-10	1.24(1.16-1.32)	0.489443	0.449418	0.497259	0.446783	0.496118	0.423012				OVRY		5 altered motifs	N		7	AEBP2, LINC02398	intergenic
rs10770555	rs35281060	0.844138	12	19971564	T	G	2.74e-10	1.24(1.16-1.32)	0.489847	0.449535	0.49723	0.446972	0.496145	0.423354						Zbtb3	N		5	AEBP2, LINC02398	intergenic
rs1388689	rs35281060	0.845051	12	19972220	C	T	2.89e-10	1.24(1.16-1.32)	0.48988	0.449635	0.497259	0.447129	0.496153	0.423407			LNG	LNG		CEBPG,GR,Mef2	N		5	AEBP2, LINC02398	intergenic
rs1388690	rs35281060	0.845508	12	19972260	T	C	3.02e-10	1.24(1.16-1.32)	0.489933	0.449776	0.497282	0.44718	0.496177	0.423443			LNG	LNG,OVRY		5 altered motifs	N		4	AEBP2, LINC02398	intergenic
rs10841369	rs35281060	0.843682	12	19972797	T	C	2.79e-10	1.24(1.16-1.32)	0.48983	0.449556	0.497226	0.447047	0.496106	0.423355						Egr-1,SIX5	N		6	AEBP2, LINC02398	intergenic
rs11044886	rs35281060	0.844138	12	19973641	C	T	2.79e-10	1.24(1.16-1.32)	0.489543	0.449506	0.497335	0.446933	0.496123	0.423053						Mrg1::Hoxa9,STAT	N		4	AEBP2, LINC02398	intergenic
rs11044887	rs35281060	0.845508	12	19973815	G	C	2.47e-10	1.24(1.16-1.32)	0.489543	0.449508	0.497335	0.446956	0.497526	0.423503						E2F,Irf,Tgif1	N		5	AEBP2, LINC02398	intergenic
rs11044888	rs35281060	0.84311	12	19974038	G	A	2.78e-10	1.24(1.16-1.32)	0.489401	0.449217	0.496895	0.446807	0.495908	0.422939				ESDR		CEBPB,Hsf	N		7	AEBP2, LINC02398	intergenic
rs10841370	rs35281060	0.844138	12	19974264	C	T	2.77e-10	1.24(1.16-1.32)	0.489543	0.449505	0.497335	0.446904	0.49612	0.423035						4 altered motifs	N		6	AEBP2, LINC02398	intergenic
rs10770556	rs35281060	0.842654	12	19974491	C	T	3.18e-10	1.24(1.16-1.32)	0.489146	0.449466	0.496989	0.446504	0.496088	0.423118						LF-A1	N		6	AEBP2, LINC02398	intergenic
rs10770557	rs35281060	0.842654	12	19974495	G	C	3.18e-10	1.24(1.16-1.32)	0.489146	0.449466	0.496989	0.446504	0.496088	0.423118						Glis2,Zic	N		7	AEBP2, LINC02398	intergenic
rs10841371	rs35281060	0.844138	12	19974645	G	A	2.79e-10	1.24(1.16-1.32)	0.48951	0.449469	0.497286	0.446892	0.496102	0.423041				MUS		4 altered motifs	N		7	AEBP2, LINC02398	intergenic
rs10841372	rs35281060	0.844138	12	19974796	A	G	2.54e-10	1.24(1.16-1.32)	0.493137	0.452564	0.499179	0.448544	0.496123	0.423056						COMP1	N		7	AEBP2, LINC02398	intergenic
rs10841373	rs35281060	0.843566	12	19974831	G	A	2.89e-10	1.24(1.16-1.32)	0.489564	0.449549	0.497353	0.447002	0.496196	0.423113						11 altered motifs	N		6	AEBP2, LINC02398	intergenic
rs1388683	rs35281060	0.843682	12	19975068	G	A	2.58e-10	1.24(1.16-1.32)	0.489498	0.449418	0.497306	0.446761	0.496075	0.422882							N		7	AEBP2, LINC02398	intergenic
rs10770558	rs35281060	0.998935	12	19975862	T	C	1.91e-12	1.27(1.19-1.36)	0.541142	0.492623	0.543952	0.489901	0.547337	0.470619						GATA	N		7	AEBP2, LINC02398	intergenic
rs10743339	rs35281060	0.998402	12	19975891	T	C	2.16e-12	1.27(1.19-1.36)	0.541193	0.492833	0.544443	0.49045	0.547427	0.470812						8 altered motifs	N		6	AEBP2, LINC02398	intergenic
rs35281060	rs35281060	1	12	19976182	TG	T	1.39e-12	0.79(0.74-0.84)	0.451357	0.499891	0.450689	0.505996	0.428906	0.504858			VAS			Ik-1,Ik-2	N		7	AEBP2, LINC02398	intergenic
rs1815190	rs35281060	0.997337	12	19976403	C	T	2.15e-12	1.27(1.19-1.36)	0.541142	0.492742	0.543951	0.490163	0.547356	0.471034					NFYA	10 altered motifs	N		3b	AEBP2, LINC02398	intergenic
rs2011432	rs35281060	0.99787	12	19976635	G	A	1.89e-12	1.27(1.19-1.36)	0.54113	0.492615	0.543938	0.489899	0.547302	0.470445							N		4	AEBP2, LINC02398	intergenic
rs2417803	rs35281060	0.998402	12	19977024	T	C	1.92e-12	1.27(1.19-1.36)	0.54113	0.492622	0.543949	0.489899	0.547334	0.470623						CDP	N		5	AEBP2, LINC02398	intergenic
rs10841375	rs35281060	0.99787	12	19977660	A	G	1.56e-12	1.27(1.19-1.36)	0.541077	0.492528	0.544081	0.489411	0.547293	0.47056						Myc,SREBP	N		5	AEBP2, LINC02398	intergenic
rs10841376	rs35281060	0.993614	12	19979881	C	G	1.71e-12	0.79(0.74-0.84)	0.452958	0.500966	0.453743	0.507386	0.425313	0.503069				BRST		LUN-1,Mrg1::Hoxa9,Sox	N		5	AEBP2, LINC02398	intergenic
rs10841377	rs35281060	0.992022	12	19979927	C	T	1.7e-12	0.79(0.74-0.84)	0.453022	0.501019	0.453789	0.507441	0.425346	0.503105				BRST,CRVX			N		3a	AEBP2, LINC02398	intergenic
rs1038666	rs1038666	1	12	29085005	G	A	5.09e-10	0.81(0.76-0.87)	0.573085	0.609433	0.532294	0.612904	0.553174	0.600546						Rad21	Y		5	CCDC91, FAR2	intergenic
rs11157733	rs11157733	1	14	50727523	G	A	2.65e-08	1.21(1.13-1.29)	0.462535	0.423254	0.478269	0.419411	0.459929	0.425547				23 tissues	4 bound proteins	CAC-binding-protein	Y		2b	L2HGDH	intronic
rs4901006	rs11157733	0.996207	14	50729133	C	T	3e-08	1.21(1.13-1.29)	0.462751	0.423695	0.478415	0.419716	0.453689	0.419961			MUS				Y		6	L2HGDH	intronic
rs58255598	rs58255598	1	14	62131805	C	T	2.16e-08	0.81(0.75-0.87)	0.276388	0.318856	0.278359	0.324492	0.271678	0.324056			BLD	BLD			N		7	FLJ22447,HIF1A-AS1	intergenic
rs189646742	rs189646742	1	15	88017055	G	A	2.13e-08	2.03(1.59-2.61)	0.0261491	0.0123248	0.0174793	0.0113537	0.0202671	0.0122205						E2A,TATA	N		6	AGBL1, LINC00052	intergenic
16-69854329	rs376989376	1	16	69854329	T	TAG	1.08e-08	0.79(0.73-0.86)	0.659957	0.693348	0.676846	0.70231	0.639268	0.699049							N		3a	WWP2	intronic
CHR, chromosome; REF, reference; ALT, alternative; GWAS, genome wide association study; OR, odds ratio.
