# Supplementary material for: Genetic insights into ossification of the posterior longitudinal ligament of the spine
Source: eLife. 2023 Jul 18;12:e86514. doi: 10.7554/eLife.86514 (PMC10353864; doi:10.7554/eLife.86514)
Supplement: Supplementary file 4. [file elife-86514-supp4.xlsx]

## Sheet: ST4
Supplementaly Table 4. Causal variants estimated by a Bayesian statistical fine-mapping analysis
Region	Rank	CHR	Position	SNP	PP
Chr2:26598097-28598097	1	2	27598097	rs4665972	0.548122
	2	2	27752463	rs11127048	0.0663501
	3	2	27674931	rs151269177	0.0378523
	4	2	27730940	rs1260326	0.035771
	5	2	27734972	rs6547692	0.0246212
	6	2	27741237	rs780094	0.0207874
	7	2	27741072	rs780096	0.0206233
	8	2	27741105	rs780095	0.0204588
	9	2	27748992	rs11336847	0.0164903
	10	2	27750545	rs2950835	0.0159277
	11	2	27750546	rs2911711	0.015823
	12	2	27748904	rs1313566	0.0138497
	13	2	27748624	rs1260333	0.0120523
	14	2	27744364	rs373060500	0.0106288
	15	2	27739880	rs10549495	0.0102877
	16	2	27742603	rs780093	0.00924624
	17	2	27745764	rs34507360	0.00694062
	18	2	27827326	rs71882946	0.00599052
	19	2	27752871	rs6753534	0.0058931
	20	2	27748597	rs1260334	0.00529514
	21	2	27837544	rs34716327	0.00495543
	22	2	27825715	rs12467476	0.00440267
	23	2	27832055	rs2384656	0.00431249
	24	2	27827092	rs12464616	0.00431019
	25	2	27839539	rs2068834	0.00388812
	26	2	27839369	rs4666000	0.00388812
	27	2	27833502	rs74175068	0.00386597
	28	2	27836605	rs13020949	0.00381085
	29	2	27834152	rs12987055	0.00381081
	30	2	27833687	rs34016998	0.0038106
	31	2	27755825	rs4665987	0.00377092
	32	2	27840640	rs4666002	0.00365617
Chr6:43529797-45538139	1	6	44538139	rs927485	0.282274
	2	6	44533069	rs9357448	0.152366
	3	6	44529942	rs9367204	0.102694
	4	6	44529797	rs6932764	0.08014
	5	6	44529823	rs6912544	0.0752213
	6	6	44531314	rs6901376	0.0540636
	7	6	44533877	rs9349295	0.0333188
	8	6	44537457	rs6458398	0.0317755
	9	6	44533628	rs1322660	0.0316168
	10	6	44533553	rs1322659	0.0308192
	11	6	44534808	rs9395031	0.0307006
	12	6	44537284	rs59105612	0.030597
	13	6	44534397	rs7747763	0.0301057
Chr8:108022775-110588327	1	8	109096029	rs374810	0.0142163
	2	8	109098742	rs672243	0.0135605
	3	8	109101012	rs405762	0.0132473
	4	8	109094068	rs429315	0.0132428
	5	8	109093578	rs423940	0.0132422
	6	8	109103375	rs403200	0.0132015
	7	8	109105285	rs399131	0.0131755
	8	8	109103274	rs422847	0.0130606
	9	8	109101925	rs409026	0.0130363
	10	8	109101263	rs702781	0.0130351
	11	8	109104905	rs378515	0.0127654
	12	8	109123398	rs547082	0.012093
	13	8	109114430	rs617072	0.0117379
	14	8	109120127	rs443680	0.0112402
	15	8	109062481	rs2443775	0.0108108
	16	8	109064957	rs2443774	0.0107243
	17	8	109108740	rs396149	0.0107243
	18	8	109062046	rs2514842	0.0106708
	19	8	109117403	rs421695	0.010536
	20	8	109115122	rs429884	0.0104965
	21	8	109119455	rs435247	0.010492
	22	8	109118714	rs443558	0.0103527
	23	8	109064809	rs2514844	0.0103171
	24	8	109072593	rs2443773	0.00999522
	25	8	109120820	rs424976	0.0097544
	26	8	109119837	rs622044	0.00967095
	27	8	109067078	rs2440387	0.00953459
	28	8	109067105	rs2514846	0.00908849
	29	8	109130620	rs371878	0.00903449
	30	8	109071908	rs4431570	0.00896982
	31	8	109135101	rs453634	0.00892512
	32	8	109124222	rs438191	0.00870088
	33	8	109124593	rs416611	0.00861673
	34	8	109142079	rs381742	0.00808997
	35	8	109140842	rs648596	0.00808783
	36	8	109063434	rs2514843	0.00720078
	37	8	109194535	rs35192035	0.00628453
	38	8	109222271	rs34870098	0.00570832
	39	8	109185666	rs55670653	0.00553338
	40	8	109178612	rs34873543	0.00521004
	41	8	109181515	rs62539602	0.0050709
	42	8	109183738	rs36142508	0.00491833
	43	8	109138107	rs669584	0.00459746
	44	8	109180764	rs614777	0.00442327
	45	8	109182864	rs78533780	0.00389554
	46	8	109218821	rs72312119	0.00388939
	47	8	109183159	rs200909391	0.00387006
	48	8	109180609	rs584941	0.00386349
	49	8	109178048	rs660816	0.00373083
	50	8	109179476	rs598774	0.00371071
	51	8	109184068	rs13269620	0.00370254
	52	8	109185159	rs673356	0.0036723
	53	8	109251690	rs674580	0.00366336
	54	8	109186398	rs689256	0.00365983
	55	8	109179846	rs201322000	0.00365339
	56	8	109183031	rs13259740	0.00365339
	57	8	109183074	rs13257342	0.00365339
	58	8	109182788	rs150663427	0.00365339
	59	8	109181209	rs111916848	0.00365339
	60	8	109178634	rs584716	0.00365339
	61	8	109181622	rs28773795	0.00364065
	62	8	109242303	rs676654	0.00360446
	63	8	109177572	rs677330	0.00360136
	64	8	109225105	rs35352376	0.00352871
	65	8	109179914	rs13258380	0.00346391
	66	8	109157030	rs34546876	0.00344983
	67	8	109190044	rs34511754	0.00342387
	68	8	109199296	rs36070162	0.00340185
	69	8	109182031	rs7832220	0.00336588
	70	8	109190809	rs33955628	0.00324412
	71	8	109185461	rs677004	0.00314762
	72	8	109185463	rs674780	0.0031424
	73	8	109234404	rs3837187	0.00313076
	74	8	109179195	rs676084	0.00312876
	75	8	109241085	rs605269	0.00310808
	76	8	109154652	rs424012	0.00303877
	77	8	109196472	rs550135309	0.00301175
	78	8	109196322	rs36103581	0.00296294
	79	8	109199383	rs11318369	0.00294702
	80	8	109193903	rs57426641	0.00294164
	81	8	109228008	rs611744	0.0029377
	82	8	109179993	rs200191813	0.00291984
	83	8	109185807	rs34401526	0.00289439
	84	8	109238420	rs200540762	0.00289438
	85	8	109218824	rs527272483	0.00287648
	86	8	109181895	rs7815875	0.00283453
	87	8	109154408	rs405534	0.00281103
	88	8	109154233	rs408506	0.00281082
	89	8	109150388	rs35793369	0.00280077
	90	8	109235457	rs635941	0.00279159
	91	8	109215100	rs619227	0.00277556
	92	8	109253208	rs36025931	0.00276335
	93	8	109180403	rs11985647	0.00275716
	94	8	109168375	rs67329445	0.00275547
	95	8	109190032	rs631031	0.00270849
	96	8	109194436	rs112793143	0.0026672
	97	8	109180737	rs614751	0.00264157
	98	8	109196725	rs650925	0.00262575
	99	8	109255206	rs629996	0.00262473
	100	8	109261780	rs4735054	0.00261627
	101	8	109262296	rs59930666	0.00261319
	102	8	109177539	rs677288	0.0026041
	103	8	109193205	rs56799452	0.00260126
	104	8	109213826	rs377909	0.00259207
	105	8	109263237	rs13282825	0.00257675
	106	8	109187759	rs598022	0.0025381
	107	8	109224500	rs427145	0.0025356
	108	8	109180279	rs11992860	0.00253317
	109	8	109213088	rs661036	0.0024309
	110	8	109180143	rs74746700	0.00242243
	111	8	109242803	rs674391	0.00242157
	112	8	109241822	rs689275	0.0024095
	113	8	109251795	rs11296811	0.00240022
	114	8	109191669	rs673015	0.00239943
	115	8	109242981	rs633901	0.00236514
	116	8	109239207	rs569701	0.00233709
	117	8	109189220	rs10605321	0.00232729
	118	8	109203406	rs638905	0.0023217
	119	8	109164182	rs672161	0.00231859
	120	8	109230383	rs653081	0.00231397
	121	8	109199763	rs686265	0.0023113
	122	8	109204313	rs666821	0.00231128
	123	8	109199417	rs684904	0.00230841
	124	8	109203954	rs654911	0.00230813
	125	8	109207886	rs1452021	0.00230761
	126	8	109213893	rs603571	0.00230761
	127	8	109218012	rs34286220	0.00230761
	128	8	109218612	rs584555	0.00230745
	129	8	109210905	rs684412	0.00230594
	130	8	109210559	rs682954	0.00230594
	131	8	109239324	rs695028	0.00230594
	132	8	109210927	rs650437	0.00230575
	133	8	109211055	rs650968	0.00230575
	134	8	109212468	rs677842	0.00230573
	135	8	109218892	rs681099	0.00230573
	136	8	109211802	rs702801	0.00230573
	137	8	109220269	rs1989388	0.00230573
	138	8	109211358	rs662591	0.00230562
	139	8	109218238	rs702802	0.00230562
	140	8	109227406	rs609102	0.00230048
	141	8	109200446	rs591792	0.00229896
	142	8	109235858	rs475865	0.00229753
	143	8	109229243	rs635219	0.00229753
	144	8	109227570	rs859788	0.00229745
	145	8	109227822	rs651951	0.00229615
	146	8	109227826	rs610873	0.00229615
	147	8	109235929	rs702805	0.0022957
	148	8	109221659	rs662714	0.0022957
	149	8	109222544	rs627019	0.0022957
	150	8	109234825	rs639746	0.00229557
	151	8	109221090	rs2597654	0.00229557
	152	8	109224390	rs672408	0.00229557
	153	8	109230722	rs536860	0.00229557
	154	8	109236119	rs639059	0.00229555
	155	8	109235569	rs636399	0.00229506
	156	8	109240822	rs596245	0.00229019
	157	8	109245497	rs585077	0.00229
	158	8	109224232	rs603889	0.00228784
	159	8	109225725	rs688746	0.00228641
	160	8	109216345	rs645070	0.00227904
	161	8	109227585	rs859787	0.00226598
	162	8	109242730	rs678387	0.0022575
	163	8	109199355	rs684093	0.00222728
	164	8	109197541	rs655722	0.00222343
	165	8	109198415	rs2212704	0.00222191
	166	8	109210326	rs682007	0.00221875
	167	8	109197482	rs655320	0.00221462
	168	8	109197454	rs637358	0.00221462
	169	8	109198907	rs686251	0.0022145
	170	8	109197565	rs636904	0.00221443
	171	8	109189425	rs628340	0.00221333
	172	8	109253929	rs589347	0.00219576
	173	8	109191838	rs673854	0.00218738
	174	8	109193808	rs597992	0.0021826
	175	8	109197799	rs635624	0.00217831
	176	8	109191917	rs673981	0.0021753
	177	8	109191932	rs660065	0.0021753
	178	8	109188650	rs612265	0.00217508
	179	8	109198185	rs2848619	0.00217451
	180	8	109192145	rs685690	0.00217451
	181	8	109196115	rs628843	0.00217451
	182	8	109196151	rs653633	0.00217451
	183	8	109187166	rs595183	0.00217451
	184	8	109196571	rs651814	0.00217451
	185	8	109194160	rs599357	0.00217451
	186	8	109189819	rs627604	0.00217451
	187	8	109188263	rs610452	0.00217451
	188	8	109187718	rs597649	0.00217451
	189	8	109191260	rs671139	0.00217449
	190	8	109188994	rs613644	0.00217449
	191	8	109194850	rs612722	0.00217449
	192	8	109196854	rs650401	0.00217449
	193	8	109193881	rs34950131	0.00217218
	194	8	109188185	rs602384	0.00217051
	195	8	109190963	rs645241	0.00217005
	196	8	109198079	rs2600614	0.00217005
	197	8	109256014	rs2597658	0.00216798
	198	8	109187295	rs595733	0.00216673
	199	8	109230411	rs35139024	0.00216366
	200	8	109190717	rs641820	0.00214725
	201	8	109263043	rs13282220	0.00213537
	202	8	109251374	rs647907	0.00213478
	203	8	109247619	rs615126	0.00213477
	204	8	109254262	rs615233	0.00213477
	205	8	109235785	rs637626	0.00213427
	206	8	109252746	rs631775	0.00212907
	207	8	109254003	rs667742	0.00212905
	208	8	109247873	rs628206	0.00212905
	209	8	109252554	rs702808	0.00212905
	210	8	109249551	rs2848620	0.00212886
	211	8	109255032	rs681963	0.00212886
	212	8	109246032	rs587340	0.0021279
	213	8	109193607	rs594405	0.00212566
	214	8	109167304	rs2348800	0.00212009
	215	8	109170925	rs666862	0.00211616
	216	8	109160146	rs596703	0.00211595
	217	8	109161413	rs685358	0.00211554
	218	8	109169152	rs638238	0.00211418
	219	8	109165949	rs613261	0.0021083
	220	8	109171573	rs702792	0.0021083
	221	8	109164223	rs672552	0.0021083
	222	8	109173843	rs656406	0.00210766
	223	8	109171627	rs702793	0.00210753
	224	8	109192357	rs686584	0.00210436
	225	8	109166006	rs613179	0.00209766
	226	8	109249300	rs864166	0.00209555
	227	8	109261318	rs1457211	0.00209132
	228	8	109262570	rs7015513	0.00209094
	229	8	109263240	rs13280454	0.0020833
	230	8	109260776	rs4735053	0.00207808
	231	8	109263497	rs2859813	0.00207625
	232	8	109262752	rs7016198	0.00206632
	233	8	109255989	rs2594357	0.00205893
	234	8	109244742	rs679077	0.00205751
	235	8	109187874	rs598477	0.0020529
	236	8	109201170	rs2600615	0.00203294
	237	8	109198401	rs2212703	0.00198529
	238	8	109262204	rs7015240	0.00197099
	239	8	109254842	rs579162	0.0019629
	240	8	109191700	rs1668178	0.00193099
	241	8	109230140	rs641721	0.00192935
	242	8	109254677	rs627392	0.00191434
	243	8	109157819	rs640950	0.00188538
	244	8	109238721	rs604698	0.00188358
	245	8	109245991	rs612744	0.0018582
	246	8	109191432	rs56858470	0.00185078
	247	8	109192453	rs672591	0.00184684
	248	8	109191433	rs57723916	0.00184627
	249	8	109263705	rs1584374	0.00183163
	250	8	109267392	rs58402864	0.00182329
	251	8	109256018	rs2594358	0.00181808
	252	8	109258333	rs13251024	0.00176849
	253	8	109158002	rs640068	0.00176016
Chr8:116484907-118588193	1	8	117579970	rs1898287	0.0702718
	2	8	117584829	rs2033691	0.0587283
	3	8	117564936	rs7817087	0.0569656
	4	8	117574612	rs6988499	0.0559606
	5	8	117566387	rs4876361	0.0548509
	6	8	117588193	rs9297558	0.0511953
	7	8	117565333	rs10553398	0.0487104
	8	8	117572538	rs77249084	0.0419773
	9	8	117563532	rs1550162	0.0414912
	10	8	117572459	rs36103712	0.0408746
	11	8	117560528	rs6987839	0.0296306
	12	8	117556270	rs4876662	0.0277374
	13	8	117544489	rs7835825	0.0267627
	14	8	117545750	rs4876661	0.0259443
	15	8	117556284	rs4876360	0.023533
	16	8	117552823	rs6987106	0.0234779
	17	8	117548699	rs6469649	0.0227359
	18	8	117544962	rs11985989	0.0201079
	19	8	117516022	rs12547691	0.0166431
	20	8	117520266	rs11991164	0.016163
	21	8	117519584	rs13269586	0.0161478
	22	8	117541607	rs13279799	0.0160347
	23	8	117534457	rs6980899	0.0156286
	24	8	117540262	rs13266870	0.0154259
	25	8	117528505	rs7015305	0.015134
	26	8	117542160	rs4876660	0.0150033
	27	8	117517107	rs4876658	0.0141427
	28	8	117517114	rs11376677	0.013005
	29	8	117506653	rs4333630	0.00685299
	30	8	117506028	rs13264101	0.00684187
	31	8	117505449	rs13253069	0.00547095
	32	8	117513397	rs7814765	0.00495236
	33	8	117502646	rs7838071	0.00391112
	34	8	117498674	rs13272144	0.00358752
	35	8	117505270	rs13252528	0.00336096
	36	8	117505928	rs12675379	0.00335809
	37	8	117519662	rs4128874	0.00312688
	38	8	117498462	rs13272018	0.00309516
	39	8	117498697	rs13274249	0.00309369
	40	8	117510903	rs13276560	0.00304969
	41	8	117509887	rs4876357	0.00304652
	42	8	117512275	rs4366104	0.00301303
	43	8	117519136	rs7843643	0.00298394
	44	8	117518676	rs7821109	0.00288759
	45	8	117519089	rs7825165	0.00288341
	46	8	117514048	rs4876657	0.00287598
	47	8	117521331	rs10088293	0.00285305
	48	8	117521293	rs4876358	0.00282838
	49	8	117499039	rs4358832	0.00281001
Chr11:85724086-87887931	1	11	86830927	rs35505248	0.0210276
	2	11	86868732	rs5793242	0.0157109
	3	11	86868742	rs5028348	0.0130357
	4	11	86847703	rs5793240	0.0120457
	5	11	86868727	rs531500	0.0087859
	6	11	86855797	rs57015442	0.00725624
	7	11	86835374	rs2512344	0.00696531
	8	11	86876899	rs61531290	0.00691143
	9	11	86834623	rs34976066	0.00685238
	10	11	86826934	rs2512495	0.00650115
	11	11	86856730	rs566036019	0.00648591
	12	11	86856763	rs486739	0.00619726
	13	11	86842992	rs500312	0.00611807
	14	11	86831635	rs3133321	0.00611576
	15	11	86827946	rs2451065	0.006021
	16	11	86835722	rs597406	0.00599526
	17	11	86881621	rs572433	0.00598249
	18	11	86861257	11-86861257	0.00595695
	19	11	86826749	rs2512494	0.00590078
	20	11	86835175	rs2512342	0.00589491
	21	11	86832576	rs660246	0.00584133
	22	11	86833101	rs488227	0.00583775
	23	11	86832604	rs483548	0.00581949
	24	11	86835260	rs2512343	0.005819
	25	11	86835475	rs692857	0.005819
	26	11	86833728	rs1829362	0.00581892
	27	11	86834117	rs518489	0.00577757
	28	11	86872365	rs511694	0.00576593
	29	11	86872908	rs549932	0.00576234
	30	11	86881050	rs35152231	0.00576015
	31	11	86852333	rs687244	0.00575038
	32	11	86884532	rs502580	0.00574551
	33	11	86877799	rs60027610	0.00564749
	34	11	86827617	rs5793237	0.00560285
	35	11	86834319	rs35728847	0.00558073
	36	11	86834313	rs35903615	0.00554678
	37	11	86836785	rs612523	0.00552061
	38	11	86884018	rs476597	0.0054657
	39	11	86884615	rs603140	0.0054657
	40	11	86882599	rs552521	0.0054657
	41	11	86884825	rs604035	0.00546559
	42	11	86882981	rs495238	0.00546559
	43	11	86883454	rs520755	0.00546559
	44	11	86886904	rs565869	0.00546463
	45	11	86885342	rs606299	0.00546463
	46	11	86886175	rs2512490	0.00546463
	47	11	86886408	rs2451060	0.00546438
	48	11	86839381	rs655050	0.005438
	49	11	86887931	rs634277	0.00541182
	50	11	86878971	rs484403	0.00538444
	51	11	86840057	rs71040294	0.00536844
	52	11	86840973	rs60438604	0.00536284
	53	11	86843865	rs34935722	0.00535715
	54	11	86830772	rs3018709	0.00526371
	55	11	86872504	rs546229	0.00524366
	56	11	86872104	rs513662	0.0052414
	57	11	86830793	rs3103386	0.00523624
	58	11	86830715	rs3018710	0.00522824
	59	11	86830485	rs2451061	0.0052108
	60	11	86881464	rs570716	0.0051814
	61	11	86828153	rs2451064	0.00513965
	62	11	86866109	rs603676	0.00513461
	63	11	86844841	rs36070851	0.00512538
	64	11	86835679	rs597344	0.00512276
	65	11	86842813	rs609914	0.00511388
	66	11	86833562	rs1829359	0.00510372
	67	11	86833565	rs1829360	0.00510372
	68	11	86880458	rs540403	0.00510307
	69	11	86879011	rs511755	0.00509746
	70	11	86850483	rs483373	0.00505257
	71	11	86828228	rs2451063	0.00503948
	72	11	86828686	rs2451062	0.00503885
	73	11	86827825	rs2445560	0.00503885
	74	11	86828786	rs2445561	0.00501788
	75	11	86877051	rs4604911	0.00499505
	76	11	86877117	rs4635105	0.00498566
	77	11	86876396	rs57024158	0.0049829
	78	11	86863761	rs561397	0.00497176
	79	11	86854505	rs609819	0.00496893
	80	11	86878332	rs484135	0.00496482
	81	11	86872647	rs547867	0.00496482
	82	11	86877666	rs561778	0.00496356
	83	11	86839947	rs35418233	0.00496186
	84	11	86877716	rs607894	0.00496022
	85	11	86879342	rs509277	0.00491909
	86	11	86847185	rs487678	0.00491317
	87	11	86848478	rs543915	0.00491317
	88	11	86848358	rs628447	0.00491279
	89	11	86848756	rs630249	0.00491261
	90	11	86864892	rs482258	0.00488507
	91	11	86858868	rs687208	0.00488056
	92	11	86864277	rs566046	0.00488056
	93	11	86860509	rs477944	0.00488042
	94	11	86863609	rs651961	0.00488042
	95	11	86861753	rs522439	0.00488042
	96	11	86860244	rs606284	0.00488042
	97	11	86862397	rs636159	0.00488042
	98	11	86854250	rs608870	0.00487357
	99	11	86854217	rs608533	0.00487349
	100	11	86859142	rs533056	0.00486345
	101	11	86867252	rs618926	0.00486174
	102	11	86865952	rs12280110	0.00486174
	103	11	86870469	rs494698	0.00486171
	104	11	86868347	rs556139	0.00486171
	105	11	86870511	rs664398	0.00485991
	106	11	86866802	rs543687	0.00485855
	107	11	86873570	rs577329	0.00485769
	108	11	86877016	rs4514447	0.00485744
	109	11	86856437	rs655778	0.00485657
	110	11	86856021	rs626897	0.00485657
	111	11	86857447	rs670125	0.00485655
	112	11	86855391	rs541089	0.00485655
	113	11	86857498	rs568905	0.00485655
	114	11	86826963	rs2512496	0.00485652
	115	11	86856206	rs654569	0.00485548
	116	11	86867479	rs563688	0.00485331
	117	11	86868071	rs576679	0.00484407
	118	11	86866260	rs604199	0.0048371
	119	11	86870848	rs580120	0.00482165
	120	11	86854903	rs611579	0.00480247
	121	11	86854857	rs611523	0.00480102
	122	11	86857174	rs482339	0.00479639
	123	11	86854309	rs608966	0.00479564
	124	11	86855296	rs541998	0.00479478
	125	11	86854595	rs610228	0.00478825
	126	11	86852427	rs687651	0.00477822
	127	11	86852593	rs688542	0.00477822
	128	11	86852758	rs497592	0.00477816
	129	11	86852569	rs499388	0.00477816
	130	11	86852877	rs581833	0.00477816
	131	11	86853125	rs593243	0.00477816
	132	11	86840718	rs2512338	0.00476425
	133	11	86836625	rs564877	0.00476199
	134	11	86837184	rs34601982	0.00476162
	135	11	86836692	rs2932120	0.00476138
	136	11	86840098	rs491895	0.00475674
	137	11	86876848	rs4451756	0.00475536
	138	11	86851316	rs672269	0.00475527
	139	11	86876828	rs4514446	0.0047551
	140	11	86850705	rs2247537	0.00475504
	141	11	86850736	rs2512350	0.00475442
	142	11	86851267	rs672194	0.00475429
	143	11	86849633	rs644083	0.00475017
	144	11	86868965	rs495668	0.00474681
	145	11	86836408	rs563019	0.00474238
	146	11	86842383	rs150087331	0.00473289
	147	11	86842783	rs502165	0.00472638
	148	11	86843374	rs496671	0.00472127
	149	11	86839536	rs655907	0.00472046
	150	11	86866652	rs542678	0.00471033
	151	11	86859033	rs534009	0.00469941
	152	11	86869577	rs649693	0.00469432
	153	11	86861127	rs620303	0.00467097
	154	11	86849686	rs644457	0.00466997
	155	11	86842411	rs11234985	0.00465698
	156	11	86853997	rs597319	0.00463762
	157	11	86841969	rs595930	0.00462427
	158	11	86844886	rs550988	0.00461587
	159	11	86830909	rs3133320	0.00459477
	160	11	86857564	rs670857	0.00458723
	161	11	86842812	rs502079	0.00456301
	162	11	86844422	rs7949278	0.00455267
	163	11	86882874	rs555190	0.00454116
	164	11	86838100	rs628686	0.00451734
	165	11	86882043	rs492896	0.0045112
	166	11	86863374	rs576582	0.00450639
	167	11	86868033	rs632708	0.00448417
	168	11	86849091	rs538494	0.00443939
	169	11	86837865	rs487370	0.00435731
	170	11	86844578	rs7949665	0.00433414
	171	11	86858553	rs111307209	0.00427857
	172	11	86881246	rs654485	0.00426112
	173	11	86881007	rs653519	0.00426112
	174	11	86878421	rs479593	0.00426112
	175	11	86880711	rs652171	0.00426112
	176	11	86860551	rs607619	0.00423083
	177	11	86849413	rs643175	0.00420502
	178	11	86849397	rs643145	0.00414195
Chr12:18955794-20077000	1	12	19976182	rs35281060	0.117864
	2	12	19977660	rs10841375	0.105264
	3	12	19979927	rs10841377	0.0969628
	4	12	19979881	rs10841376	0.096556
	5	12	19976635	rs2011432	0.0874487
	6	12	19975862	rs10770558	0.0869465
	7	12	19977024	rs2417803	0.0863494
	8	12	19970752	rs117180159	0.0824621
	9	12	19976403	rs1815190	0.0775905
	10	12	19975891	rs10743339	0.0769409
	11	12	19971132	rs11044883	0.0734119
Chr12:20077000-21247540	1	12	20213600	rs10841442	0.208405
	2	12	20210632	rs10841441	0.11277
	3	12	20199962	rs10743353	0.0851258
	4	12	20203427	rs4344568	0.0488208
	5	12	20209376	rs10770611	0.0485329
	6	12	20144754	rs10770588	0.045299
	7	12	20208615	rs2728565	0.0289793
	8	12	20208230	rs2728576	0.0278406
	9	12	20210545	rs2438677	0.0231073
	10	12	20247188	rs3886356	0.0156247
	11	12	20179274	rs4441089	0.0114227
	12	12	20190474	rs2417820	0.0109446
	13	12	20156871	rs12231460	0.0105765
	14	12	20179445	rs3058435	0.00994571
	15	12	20188143	rs2417822	0.00934088
	16	12	20159457	rs11390989	0.00888189
	17	12	20154121	rs10770589	0.0086405
	18	12	20159414	rs7961111	0.00843683
	19	12	20184524	rs4762920	0.00811133
	20	12	20184539	rs4762921	0.00797098
	21	12	20180241	rs10770607	0.00699968
	22	12	20154266	rs10743348	0.0069159
	23	12	20155394	rs10841427	0.00670916
	24	12	20192972	rs3752728	0.00561521
	25	12	20164063	rs10770595	0.00506557
	26	12	20196845	rs12829468	0.00504122
	27	12	20147838	rs7358636	0.00498075
	28	12	20183075	rs386760950	0.00486671
	29	12	20183941	rs10770608	0.0047972
	30	12	20163341	rs11044981	0.00469302
	31	12	20164203	rs7972957	0.00452891
	32	12	20164990	rs10841431	0.00439882
	33	12	20166110	rs7980996	0.00437371
	34	12	20166338	rs7952739	0.00436291
	35	12	20183103	rs6487057	0.00434004
	36	12	20164542	rs7973599	0.00430427
	37	12	20183083	rs55780032	0.00429355
	38	12	20183076	rs56313002	0.00429042
	39	12	20183101	rs6487056	0.00429042
	40	12	20164705	rs7973748	0.00427695
	41	12	20164094	rs7972834	0.0042687
	42	12	20166211	rs7967625	0.00426079
	43	12	20164867	rs10841430	0.00423939
	44	12	20164761	rs7960456	0.00419501
	45	12	20183071	rs66644965	0.00406036
	46	12	20165560	rs4762915	0.0039973
	47	12	20205249	rs139440878	0.00395061
	48	12	20166268	rs7952935	0.00394959
	49	12	20166069	rs10770600	0.00388093
	50	12	20165926	rs10770598	0.00388091
	51	12	20165875	rs10770597	0.00388011
	52	12	20190268	rs2417821	0.00371667
	53	12	20165485	rs4762914	0.00370308
	54	12	20165947	rs10770599	0.0036925
	55	12	20205615	rs56782632	0.00365339
	56	12	20165476	rs4762913	0.00363736
	57	12	20191076	rs4529947	0.00363422
	58	12	20189621	rs10770609	0.00360232
	59	12	20188091	rs2417823	0.00344626
	60	12	20165464	rs4762912	0.00337711
	61	12	20190630	rs4306343	0.0033735
	62	12	20191661	rs2417817	0.00336168
	63	12	20191900	rs4409914	0.00336168
	64	12	20192270	rs7980003	0.00335577
	65	12	20187928	rs2417824	0.00321952
	66	12	20169839	rs10770606	0.00314977
	67	12	20191701	rs146416504	0.00301133
	68	12	20171932	rs12828338	0.00274675
	69	12	20213912	rs12227656	0.00264049
	70	12	20172112	rs11358039	0.00264014
	71	12	20171602	rs11044985	0.0024773
	72	12	20171926	rs12827990	0.00241512
Chr12:27300776-28800000	1	12	28471504	rs11049529	0.105304
	2	12	28469111	rs980920	0.102413
	3	12	28463327	rs2061759	0.101044
	4	12	28466236	rs55996833	0.0991813
	5	12	28450151	rs11049513	0.0564339
	6	12	28507059	rs2348234	0.0514031
	7	12	28491157	rs2169755	0.0367104
	8	12	28483235	rs2348233	0.0364762
	9	12	28522761	rs78500430	0.027391
	10	12	28532727	rs11049565	0.026201
	11	12	28442687	rs34616238	0.0232197
	12	12	28442074	rs11049506	0.0230982
	13	12	28407705	rs34812000	0.0227303
	14	12	28483193	rs2881859	0.0219454
	15	12	28487918	rs72054033	0.0200162
	16	12	28451311	rs79395932	0.0197254
	17	12	28441064	rs10843148	0.0132063
	18	12	28534569	rs1257741	0.0106588
	19	12	28595844	rs3858544	0.0104769
	20	12	28563636	rs786710	0.0101426
	21	12	28491249	rs34192753	0.0101109
	22	12	28523309	rs7977429	0.00871638
	23	12	28544464	rs3741760	0.00805006
	24	12	28423346	rs6487672	0.00728735
	25	12	28407090	rs11049487	0.00725595
	26	12	28451051	rs67213809	0.00671519
	27	12	28482589	rs11049535	0.00622122
	28	12	28615233	rs7314502	0.0051798
	29	12	28448813	rs11049512	0.00517805
	30	12	28521278	rs1586867	0.00517039
	31	12	28521109	rs1586868	0.00510067
	32	12	28528509	rs11049562	0.00505854
	33	12	28406515	rs1979679	0.00471637
	34	12	28404742	rs75757272	0.00465402
	35	12	28587231	rs4359252	0.00460172
	36	12	28551567	rs2638950	0.00440227
	37	12	28559263	rs786711	0.00429758
	38	12	28546037	rs2638952	0.00407558
	39	12	28614139	rs1533142	0.0036469
	40	12	28520746	rs3963302	0.00356189
	41	12	28653701	rs1002863	0.00355294
	42	12	28573647	rs786707	0.0030964
	43	12	28395851	rs7138497	0.00294603
	44	12	28381490	rs36097532	0.00283202
	45	12	28359985	rs12049916	0.00247574
	46	12	28360621	rs11049461	0.00244126
	47	12	28343976	rs35098487	0.00233715
Chr12:28800000-30107711	1	12	29085005	rs1038666	0.533417
	2	12	29075628	rs112500372	0.0174323
	3	12	29083579	rs11049922	0.0158123
	4	12	29074879	rs11494784	0.0155663
	5	12	29077826	rs11049920	0.0145836
	6	12	29074606	rs11494783	0.0140992
	7	12	29074195	rs11513254	0.014099
	8	12	29073886	rs11519341	0.014099
	9	12	29102768	rs11049941	0.0134223
	10	12	29082702	rs10843274	0.0130688
	11	12	29080104	rs7973181	0.0125718
	12	12	29086159	rs11049924	0.0118154
	13	12	29103864	rs11049943	0.011691
	14	12	29098661	rs111702909	0.0109035
	15	12	29090688	rs11049927	0.0108912
	16	12	29103922	rs11049944	0.0108735
	17	12	29091843	rs73066500	0.0107406
	18	12	29089874	rs11049926	0.0101794
	19	12	29098257	rs4930838	0.0097768
	20	12	29107711	rs73068416	0.00826936
	21	12	29061712	rs1489079	0.00778688
	22	12	29064921	rs73095742	0.00729376
	23	12	29066621	rs11049912	0.00707833
	24	12	29035834	rs56405214	0.00690223
	25	12	29059589	rs73095734	0.00686967
	26	12	29067459	rs10843273	0.00643122
	27	12	29068451	rs7310847	0.00638992
	28	12	29065600	rs1489082	0.00638958
	29	12	29049483	rs7305175	0.00638905
	30	12	29061967	rs2029375	0.00638863
	31	12	29059332	rs57748932	0.00625666
	32	12	29058022	rs4142881	0.00625428
	33	12	29068099	rs11049913	0.00621593
	34	12	29061756	rs1489080	0.00620837
	35	12	29059031	rs55860634	0.00584414
	36	12	29072303	rs11513475	0.00567721
	37	12	29069963	rs11049915	0.00567721
	38	12	29072480	rs11049918	0.00567721
	39	12	29063411	rs12371175	0.00567297
	40	12	29061454	rs4635124	0.0055602
	41	12	29053923	rs2349020	0.00554638
	42	12	29049946	rs1489086	0.00549665
	43	12	29035206	rs11049894	0.00525993
	44	12	29036154	rs12371571	0.00514049
	45	12	29034762	rs7966118	0.0051307
	46	12	29043718	rs7974624	0.00499436
	47	12	29054582	rs7968666	0.00487974
	48	12	29049298	rs7304629	0.00484968
	49	12	29048360	rs1015722	0.00484952
	50	12	29054400	rs4511318	0.00476507
Chr14:49727523-51729133	1	14	50727523	rs11157733	0.333273
	2	14	50729133	rs4901006	0.296091
	3	14	50726972	rs75481167	0.0467256
	4	14	50773539	rs78230395	0.0431116
	5	14	50702561	rs55732162	0.0126523
	6	14	50699549	rs990864	0.0105231
	7	14	50699618	rs3759595	0.0102047
	8	14	50544676	rs79969595	0.00981408
	9	14	50549888	rs8022572	0.00904522
	10	14	50545288	rs199862488	0.00873932
	11	14	50806101	rs3783418	0.00604622
	12	14	50708353	rs80228052	0.00595566
	13	14	50694761	rs5808544	0.00588289
	14	14	50712980	rs74541550	0.00543389
	15	14	50708869	rs4901001	0.00533842
	16	14	50568426	rs9944008	0.00445905
	17	14	50568159	rs34612431	0.00379137
	18	14	50538428	rs2077087	0.00332931
	19	14	50561287	rs2064665	0.0033148
	20	14	50542727	rs143458307	0.0033028
	21	14	50543544	rs149192568	0.00322289
	22	14	50539749	rs2355664	0.00319047
	23	14	50538149	rs734203	0.00318775
	24	14	50539586	rs2355663	0.00318619
	25	14	50539323	rs2092896	0.00314225
	26	14	50544936	rs202060368	0.00309508
	27	14	50538595	rs2103889	0.00308551
	28	14	50540085	rs8011551	0.00308191
	29	14	50544963	rs147949906	0.00305544
	30	14	50542795	rs184969603	0.00301452
	31	14	50530224	rs76272385	0.00300375
	32	14	50530600	rs17122039	0.00298072
	33	14	50543033	rs141702077	0.00298043
	34	14	50543161	rs138778814	0.00297292
	35	14	50538930	rs4900985	0.00297141
	36	14	50538926	rs4898645	0.00296613
	37	14	50655788	rs201465769	0.00295965
	38	14	50544077	rs12587299	0.00295306
	39	14	50542098	rs192824079	0.00293252
	40	14	50543305	rs200135788	0.0029284
	41	14	50543316	rs181854860	0.00292827
	42	14	50543287	rs144632319	0.00292827
	43	14	50542623	rs76515178	0.00290115
	44	14	50543975	rs12587260	0.00288581
	45	14	50544770	rs142497270	0.00278931
	46	14	50655779	rs10599812	0.002788
	47	14	50543094	rs150326308	0.00277246
	48	14	50546987	rs7146920	0.0027458
	49	14	50547291	rs12435523	0.00273389
	50	14	50547428	rs4900986	0.00270644
	51	14	50550242	rs2355666	0.00268026
	52	14	50546630	rs11844639	0.00264128
	53	14	50689797	rs73291663	0.00236062
	54	14	50545096	rs183324144	0.00234913
	55	14	50690119	rs77499241	0.0023418
	56	14	50689658	rs73291661	0.00234029
	57	14	50539794	rs2355665	0.00226475
	58	14	50678244	rs60362771	0.00222181
	59	14	50678373	rs56890354	0.00202183
	60	14	50678269	rs58565092	0.00200414
	61	14	50675816	rs78295334	0.00188065
	62	14	50683479	rs73291656	0.00179475
	63	14	50683485	rs147001342	0.00176495
	64	14	50684936	rs199884416	0.00130176
	65	14	50685829	rs146392357	0.00127826
	66	14	50668812	rs73289666	0.00125703
	67	14	50697878	rs2273326	0.00125514
	68	14	50557968	rs10873032	0.0012393
Chr14:61131805-63131805	1	14	62131805	rs58255598	0.489004
	2	14	62117489	rs7156083	0.0911813
	3	14	62123556	rs710043	0.0502775
	4	14	62118819	rs710047	0.043045
	5	14	62120575	rs698028	0.0389702
	6	14	62128983	rs2252261	0.0344373
	7	14	62133756	rs2783778	0.0340787
	8	14	62121312	rs34367125	0.0285242
	9	14	62114958	rs2265401	0.0269821
	10	14	62111281	rs710049	0.0154838
	11	14	62110836	rs710051	0.015295
	12	14	62111627	rs710048	0.0152786
	13	14	62110675	rs710052	0.0146924
	14	14	62107889	rs2251222	0.0144051
	15	14	62111116	rs710050	0.013481
	16	14	62111649	rs59624131	0.0110149
	17	14	62106610	rs710056	0.0104364
	18	14	62106841	rs710055	0.0104031
Chr15:87017055-89017055	1	15	88017055	rs189646742	0.392644
	2	15	88012208	rs201630651	0.085991
	3	15	88021246	rs62019736	0.0672153
	4	15	88020975	rs41419445	0.0655141
	5	15	88021406	rs146934871	0.0630143
	6	15	88009755	rs8038075	0.0482217
	7	15	88018556	rs7178837	0.0407488
	8	15	88018320	rs62019734	0.0407176
	9	15	88017319	rs17714837	0.0354122
	10	15	87988663	rs17657348	0.0226423
	11	15	87986542	rs1036808	0.0219686
	12	15	88023245	rs1442297	0.0148263
	13	15	88013298	rs6496419	0.00638188
	14	15	88012410	rs62019731	0.00611249
	15	15	88008657	rs62019724	0.00605251
	16	15	88007729	rs9672259	0.00605177
	17	15	88014684	rs139988856	0.00515127
	18	15	88008163	rs199548494	0.00476588
	19	15	88026893	rs62019737	0.00446695
	20	15	87998374	rs62019693	0.00446651
	21	15	87991757	rs56395531	0.00432984
	22	15	87990413	rs62019690	0.00431506
Chr16:68854329-70854329	1	16	69854329	rs376989376	0.381135
	2	16	69866727	rs9630631	0.0239523
	3	16	69831793	rs113856240	0.0222689
	4	16	69864675	rs6499260	0.0199823
	5	16	69867835	rs4985445	0.0195915
	6	16	69848721	rs7193221	0.0195679
	7	16	69874709	rs8059645	0.0192974
	8	16	69875191	rs7202223	0.0192356
	9	16	69869763	rs12447095	0.0189797
	10	16	69869725	rs4985374	0.0189105
	11	16	69832105	rs4275849	0.0185817
	12	16	69836805	rs11643817	0.018005
	13	16	69832247	rs4341733	0.0180001
	14	16	69834529	rs111335581	0.0179369
	15	16	69838676	rs8044920	0.0179113
	16	16	69836125	rs11075738	0.0178774
	17	16	69837465	rs4985418	0.0178019
	18	16	69833663	rs6499257	0.0176532
	19	16	69832912	rs8063219	0.0176107
	20	16	69862249	rs62051389	0.0172127
	21	16	69860655	rs62051387	0.0170912
	22	16	69864491	rs7194806	0.0170025
	23	16	69834079	rs140464457	0.0167044
	24	16	69864234	rs11075739	0.0150732
	25	16	69854029	rs60941540	0.01492
	26	16	69872404	rs7206585	0.0106808
	27	16	69855627	rs377216554	0.0104488
	28	16	69877930	rs11641899	0.0103801
	29	16	69837242	rs59561303	0.00990491
	30	16	69913996	rs8052428	0.00944884
	31	16	69859182	rs62051384	0.00933153
	32	16	69878534	rs2173714	0.00921641
	33	16	69880293	rs4985446	0.00914135
	34	16	69884723	rs12447914	0.00722464
	35	16	69884929	rs35673651	0.007129
	36	16	69885080	rs34470069	0.00646635
	37	16	69882083	rs34378064	0.00530112
	38	16	69886574	rs142684933	0.00501267
	39	16	69783903	16-69783903	0.0046468
	40	16	69887720	rs3790085	0.00459775
	41	16	69887707	rs3790086	0.00457057
	42	16	69886089	rs68039170	0.0044517
Chr20:6713042-8882559	1	20	7829397	rs6140442	0.0327506
	2	20	7713042	rs6086179	0.0325301
	3	20	7823436	rs2423300	0.0274526
	4	20	7827822	rs2423303	0.0266338
	5	20	7830533	rs2423306	0.026533
	6	20	7828382	rs73595979	0.0263973
	7	20	7831131	rs112412820	0.0262092
	8	20	7827084	rs6133500	0.0262092
	9	20	7828294	rs73595978	0.0262075
	10	20	7825181	rs73595974	0.0261101
	11	20	7718045	rs6055286	0.0241341
	12	20	7816707	rs2423289	0.0224768
	13	20	7833046	rs8114643	0.0213634
	14	20	7814047	rs2423282	0.0212648
	15	20	7806737	rs2423274	0.0211834
	16	20	7835525	rs6140447	0.021123
	17	20	7836637	rs61621514	0.0209936
	18	20	7835485	rs6133504	0.0209639
	19	20	7720943	rs6140403	0.0205444
	20	20	7795847	rs2423266	0.0190591
	21	20	7809171	rs6140437	0.0189542
	22	20	7799376	rs7508968	0.0188934
	23	20	7802457	rs6133496	0.0187619
	24	20	7768713	rs201971301	0.0184543
	25	20	7819768	rs2423294	0.018306
	26	20	7799315	rs2423268	0.0176407
	27	20	7807681	rs2423276	0.0173563
	28	20	7779348	rs199922198	0.016788
	29	20	7860699	rs6055357	0.0153175
	30	20	7791012	rs111869049	0.014474
	31	20	7841272	rs1983558	0.0142794
	32	20	7841384	rs4452227	0.0142089
	33	20	7786656	rs73595927	0.0137117
	34	20	7771576	rs4395310	0.0133704
	35	20	7771461	rs4364083	0.0132243
	36	20	7779622	rs6140427	0.0129835
	37	20	7781532	rs6140428	0.012977
	38	20	7767873	rs7267308	0.0126976
	39	20	7783559	rs6140430	0.0112033
	40	20	7845979	rs6055342	0.0111764
	41	20	7784445	rs117523174	0.0102564
	42	20	7720594	rs8114358	0.0102191
	43	20	7713377	rs10648870	0.00929621
	44	20	7715339	rs6055284	0.0089904
	45	20	7716257	rs4813839	0.00819999
	46	20	7715868	rs1569600	0.00794961
	47	20	7713617	rs2206404	0.00766155
	48	20	7719709	rs6086182	0.00745521
	49	20	7723047	rs6133483	0.00676298
	50	20	7724311	rs6140404	0.00596543
	51	20	7731679	rs73593964	0.00509441
	52	20	7735288	rs73593969	0.00499122
	53	20	7727028	rs7262331	0.00467306
	54	20	7731832	rs73593967	0.00447515
	55	20	7805805	rs909887	0.00442578
	56	20	7766241	rs11472783	0.00436899
	57	20	7729273	rs2179466	0.00426157
	58	20	7726428	rs6133484	0.00421272
	59	20	7731498	rs16993969	0.00415658
	60	20	7739919	rs6133485	0.00393288
	61	20	7741518	rs11087785	0.00387802
	62	20	7740976	rs11087784	0.00387802
	63	20	7744251	rs6140415	0.00387797
	64	20	7742039	rs6140413	0.00387663
	65	20	7742500	rs6140414	0.00387582
	66	20	7745655	rs6140416	0.00379852
	67	20	7744461	rs16993982	0.00379796
	68	20	7747814	rs6140419	0.00378997
CHR, chromosome; PP, posterior probability.
Each region is represented as "chromosome":"start position"-"end pisition".
Lead SNPs in each region are represented by bold font.
