# Supplementary material for: Genetic insights into ossification of the posterior longitudinal ligament of the spine
Source: eLife. 2023 Jul 18;12:e86514. doi: 10.7554/eLife.86514 (PMC10353864; doi:10.7554/eLife.86514)
Supplement: Supplementary file 5. [file elife-86514-supp5.xlsx]

## Sheet: ST5
Supplementaly Table 5. Gene set enrichment analysis
Category	GeneSet	N_gene	N_overlap	P	FDR*	Genes
GWAScatalog	Ossification of the posterior longitudinal ligament of the spine	11	11	7.30968e-32	1.32671e-28	PTHLH:CCDC91:HAO1:CDC5L:MIR4642:SUPT3H:RSPO2:EIF3E:EMC2:LINC00536:EIF3H
GWAScatalog	Male-pattern baldness	254	10	1.04457e-11	9.4795e-09	PTHLH:FAR2:ERGIC2:CDC5L:SUPT3H:ANGPT1:RSPO2:EIF3E:EMC2:TMEM74
GWAScatalog	Heel bone mineral density	834	11	8.59885e-08	5.20231e-05	PRSS23:TMEM135:MRPS35:CCDC91:FAR2:NFAT5:HAO1:SUPT3H:RSPO2:EIF3E:LINC00536
GWAScatalog	Periodontal disease-related phenotype (Socransky)	34	4	2.78103e-07	0.000126189	SOS2:L2HGDH:ATP5S:CDKL1
GWAScatalog	Body fat distribution (arm fat ratio)	129	5	2.21534e-06	0.000804168	CCDC91:NFAT5:NQO1:NOB1:WWP2
GWAScatalog	Blood osmolality (transformed sodium)	22	3	6.09578e-06	0.00158055	NFAT5:NQO1:NOB1
GWAScatalog	Nose morphology	22	3	6.09578e-06	0.00158055	HAO1:CDC5L:SUPT3H
GWAScatalog	Estimated glomerular filtration rate	534	7	2.46562e-05	0.00559387	SOS2:L2HGDH:NFAT5:NQO1:WWP2:PLCB1:SUPT3H
GWAScatalog	Body fat distribution (leg fat ratio)	225	5	3.28618e-05	0.00662713	CCDC91:NFAT5:NQO1:NOB1:WWP2
GWAScatalog	Stroke (ischemic)	7	2	5.40007e-05	0.00980113	CDC5L:SUPT3H
GWAScatalog	Response to TNF-alpha inhibitors in rheumatoid arthritis	9	2	9.23797e-05	0.0134324	PDE3A:SLCO1C1
GWAScatalog	Bone mineral density (paediatric, lower limb)	9	2	9.23797e-05	0.0134324	KLHL42:PTHLH
GWAScatalog	Height	898	8	9.62097e-05	0.0134324	AEBP2:PDE3A:SLCO1C1:SLCO1B3:CCDC91:WWP2:CDC5L:SUPT3H
GWAScatalog	Hip minimal joint space width	10	2	0.000115354	0.0149212	HAO1:SUPT3H
GWAScatalog	Ischemic stroke	59	3	0.000123316	0.0149212	PDE3A:AGBL1:CDC5L
GWAScatalog	Osteoarthritis	12	2	0.000168834	0.0190406	CDC5L:SUPT3H
GWAScatalog	FEV1	175	4	0.000191042	0.0190406	PRSS23:CCDC91:WWP2:CDC5L
GWAScatalog	Bone ultrasound measurement (velocity of sound)	13	2	0.000199323	0.0190406	TMEM135:CCDC91
GWAScatalog	Right lateral prefrontal cortical growth	13	2	0.000199323	0.0190406	LINC00536:EIF3H
GWAScatalog	Lung function (FVC)	184	4	0.000231361	0.020996	PTHLH:CCDC91:WWP2:CDC5L
GWAScatalog	Bone mineral density (paediatric, total body less head)	15	2	0.00026776	0.0231421	KLHL42:PTHLH
GWAScatalog	Lung function (FEV1)	78	3	0.000282345	0.0232935	PRSS23:PTHLH:CCDC91
GWAScatalog	Lumbar spine bone mineral density (trabecular)	17	2	0.000346091	0.0273111	PTHLH:CCDC91
GWAScatalog	Sodium levels	20	2	0.000482	0.0364512	TMEM135:NFAT5
Chemical_and_Genetic_pertubation	HEIDENBLAD_AMPLIFIED_IN_PANCREATIC_CANCER	57	4	2.30395e-06	0.00760763	KLHL42:CCDC91:FAR2:ERGIC2
Positional_gene_sets	chr12p11	59	8	5.96825e-14	1.78451e-11	MRPS35:MANSC4:KLHL42:PTHLH:CCDC91:FAR2:ERGIC2:OVCH1-AS1
Positional_gene_sets	chr8q23	34	6	1.80282e-11	2.69521e-09	ANGPT1:RSPO2:EIF3E:EMC2:TMEM74:LINC00536
Positional_gene_sets	chr12p12	84	5	2.62659e-07	2.61783e-05	PLEKHA5:AEBP2:PDE3A:SLCO1C1:SLCO1B3
Positional_gene_sets	chr2p23	128	5	2.1321e-06	0.000159374	EIF2B4:SNX17:ZNF513:PPM1G:FTH1P3
Positional_gene_sets	chr14q21	68	4	4.68743e-06	0.000280308	SOS2:L2HGDH:MIR4504:ATP5S
Positional_gene_sets	chr16q22	165	5	7.3816e-06	0.00036785	NFAT5:NQO1:NOB1:WWP2:MIR140
Positional_gene_sets	chr20p12	94	4	1.70109e-05	0.00072661	HAO1:TMX4:PLCB1:PLCB1-IT1
Positional_gene_sets	chr11q14	116	4	3.88976e-05	0.0014538	PRSS23:OR7E2P:FZD4:TMEM135
Positional_gene_sets	chr6p21	429	5	0.000658356	0.0218721	AARS2:SPATS1:CDC5L:MIR4642:SUPT3H
Positional_gene_sets	chr8q24	263	4	0.000887107	0.0265245	EIF3H:UTP23:RAD21:RAD21-AS1
Positional_gene_sets	chr15q25	135	3	0.00139408	0.0378935	AGBL1:LINC00052:NTRK3
Wikipathways	Translation Factors	50	3	7.51218e-05	0.0407911	EIF2B4:EIF3E:EIF3H
Curated_gene_sets	HEIDENBLAD_AMPLIFIED_IN_PANCREATIC_CANCER	57	4	2.30395e-06	0.012674	KLHL42:CCDC91:FAR2:ERGIC2
microRNA_targets	CATGTAA_MIR496	174	5	9.551e-06	0.00211077	PLEKHA5:PDE3A:PTHLH:ANGPT1:RAD21
TF_targets	AACTTT_UNKNOWN	1928	12	5.06756e-05	0.0309121	PTHLH:HIF1A:NTRK3:NFAT5:WWP2:EIF2B4:SNX17:HAO1:PLCB1:RSPO2:EIF3E:RAD21
Category, One of the category from MsigDB; GeneSet, Name of gene set as provided by MsigDB; N_gene, Number of genes in a gene set; N_overlap, Number of input genes overlapping with the gene set.
*estimated using Benjamini–Hochberg method.
