# Supplementary material for: Genetic insights into ossification of the posterior longitudinal ligament of the spine
Source: eLife. 2023 Jul 18;12:e86514. doi: 10.7554/eLife.86514 (PMC10353864; doi:10.7554/eLife.86514)
Supplement: Supplementary file 6. [file elife-86514-supp6.xlsx]

## Sheet: ST6
Supplementaly Table 6. Gene based analysis
Gene	CHR	Start	Stop	NSNP	Z-Score	P-value
EIF3E	8	109212445	109449562	732	7.5975	1.5098e-14
EMC2	8	109453830	109500145	136	7.2923	1.5238e-13
TMEM135	11	86746886	87035800	1715	5.5168	1.7263e-08
CHR, chromosome; NSNP, the number of SNPs annotated to the gene.
