# Supplementary material for: Genetic insights into ossification of the posterior longitudinal ligament of the spine
Source: eLife. 2023 Jul 18;12:e86514. doi: 10.7554/eLife.86514 (PMC10353864; doi:10.7554/eLife.86514)
Supplement: Supplementary file 7. [file elife-86514-supp7.xlsx]

## Sheet: ST7
Supplementaly Table 7. eQTL analyses for the OPLL-associated SNPs
Novel/known	SNP	Chromosome	Position	Gene	Tissue	Beta	PeQTL
Novel	rs4665972	2	27598097	NRBP1	Skin_Sun_Exposed_Lower_leg	-0.175852	6.58e-19
					Skin_Not_Sun_Exposed_Suprapubic	-0.186088	1.67e-18
					Cells_Cultured_fibroblasts	-0.186559	2.79e-15
					Adipose_Subcutaneous	-0.191343	4.94e-12
					Artery_Tibial	-0.130708	1.68e-09
					Whole_Blood	-0.106956	1.31e-08
					Colon_Transverse	-0.143928	6.69e-08
					Esophagus_Mucosa	-0.0969397	2.15e-07
					Nerve_Tibial	-0.122619	5.4e-07
					Esophagus_Muscularis	-0.11403	7.27e-07
					Adipose_Visceral_Omentum	-0.146224	1.58e-06
					Testis	-0.162964	3.53e-06
					Lung	-0.123124	8.82e-06
					Small_Intestine_Terminal_Ileum	-0.209061	2.04e-05
					Heart_Atrial_Appendage	-0.149098	2.52e-05
					Esophagus_Gastroesophageal_Junction	-0.107856	6.74e-05
					Thyroid	-0.107855	0.000178545
				AC074117.10	Brain_Cerebellum	0.55064	2.23e-10
					Cells_Cultured_fibroblasts	-0.219293	1.6e-09
					Brain_Cerebellar_Hemisphere	0.528655	6.09e-09
					Prostate	-0.217584	5.74e-06
					Esophagus_Mucosa	-0.112671	6.23e-06
					Adipose_Visceral_Omentum	-0.1229	6.68e-06
					Esophagus_Gastroesophageal_Junction	-0.138721	2.13e-05
					Thyroid	-0.0977433	3.98e-05
					Pancreas	-0.164433	6.99e-05
					Artery_Tibial	-0.0983869	0.000347435
				ATRAID	Colon_Transverse	0.193849	7.47e-08
					Cells_Cultured_fibroblasts	0.129717	1.73e-06
					Esophagus_Muscularis	0.13314	1.84e-06
					Thyroid	0.0861126	1.23e-05
					Whole_Blood	0.0640378	2.26e-05
					Skin_Not_Sun_Exposed_Suprapubic	0.10231	5.61e-05
					Esophagus_Mucosa	0.115542	6.6e-05
					Skin_Sun_Exposed_Lower_leg	0.0920395	8.88e-05
					Breast_Mammary_Tissue	0.100384	0.000100174
					Adipose_Subcutaneous	0.0850469	0.000254701
				SNX17	Muscle_Skeletal	-0.330267	2.62e-34
					Artery_Tibial	-0.109277	3.46e-05
					Heart_Atrial_Appendage	-0.11906	0.000108626
					Heart_Left_Ventricle	-0.108783	0.000135866
				KRTCAP3	Adrenal_Gland	0.468799	5.93e-08
					Muscle_Skeletal	0.190785	3.33e-06
					Whole_Blood	0.149817	5.71e-05
				PPM1G	Esophagus_Muscularis	-0.0839008	6.55e-07
					Pancreas	-0.13396	1.51e-05
					Adipose_Subcutaneous	-0.0734081	2.3e-05
				GPN1	Muscle_Skeletal	-0.125741	1.15e-06
					Heart_Left_Ventricle	-0.0969682	0.000128994
				C2orf16	Thyroid	0.128373	1.33e-05
				CAD	Pancreas	0.145427	0.000120403
				FNDC4	Thyroid	0.210746	5.29e-11
				GCKR	Thyroid	0.224571	7.83e-09
				SLC5A6	Nerve_Tibial	-0.0927014	0.0002686
	rs1038666	12	29085005	FAR2	Brain_Cerebellar_Hemisphere	0.452653	1.61e-15
					Brain_Cerebellum	0.468017	1.2e-09
	rs11157733	14	50727523	VCPKMT	Artery_Tibial	-0.438871	3.19e-32
					Esophagus_Muscularis	-0.387936	6.96e-27
					Adipose_Subcutaneous	-0.430759	9.17e-24
					Nerve_Tibial	-0.429225	4.32e-23
					Thyroid	-0.411529	5.1e-23
					Muscle_Skeletal	-0.448833	1.36e-20
					Skin_Sun_Exposed_Lower_leg	-0.313592	1.03e-18
					Colon_Sigmoid	-0.447105	3.51e-18
					Skin_Not_Sun_Exposed_Suprapubic	-0.261536	2.49e-15
					Artery_Aorta	-0.348961	5.1e-14
					Colon_Transverse	-0.357539	2.09e-13
					Pancreas	-0.474682	4.25e-12
					Cells_Cultured_fibroblasts	-0.254643	8.61e-12
					Brain_Frontal_Cortex_BA9	-0.353809	3.76e-11
					Heart_Left_Ventricle	-0.269923	1.09e-10
					Testis	-0.27782	9e-10
					Stomach	-0.351776	2.86e-09
					Brain_Cerebellar_Hemisphere	-0.419255	4.27e-09
					Whole_Blood	-0.130725	7.9e-09
					Esophagus_Gastroesophageal_Junction	-0.274242	8.23e-09
					Artery_Coronary	-0.370928	3.28e-08
					Adrenal_Gland	-0.358026	2.32e-07
					Breast_Mammary_Tissue	-0.268711	3.33e-07
					Adipose_Visceral_Omentum	-0.180086	4.62e-07
					Spleen	-0.300655	6.1e-07
					Esophagus_Mucosa	-0.208284	6.54e-07
					Brain_Cerebellum	-0.376918	7.15e-07
					Brain_Cortex	-0.334372	1.61e-06
					Prostate	-0.351484	2.52e-06
					Lung	-0.173045	2.86e-06
					Heart_Atrial_Appendage	-0.230916	6.27e-06
				ATP5S	Heart_Left_Ventricle	-0.32942	5.88e-09
					Heart_Atrial_Appendage	-0.358399	9.81e-08
					Muscle_Skeletal	-0.187883	1.08e-06
					Brain_Cerebellum	-0.318595	5.37e-05
					Brain_Cerebellar_Hemisphere	-0.301204	6.59e-05
				CDKL1	Whole_Blood	0.278512	1.6e-07
				LINC01588	Stomach	-0.268291	4.18e-06
				MAP4K5	Testis	0.16641	4.53e-06
				SOS2	Lung	-0.163421	0.000107257
Known	rs927485	6	44538139	RP5-1120P11.1	Esophagus_Gastroesophageal_Junction	-0.219035	5.13e-06
	rs374810	8	109096029	EIF3E	Muscle_Skeletal	-0.115757	2.57e-09
					Brain_Cortex	-0.233963	4.03e-08
					Brain_Putamen_basal_ganglia	-0.251058	1.05e-07
					Nerve_Tibial	-0.0910784	7.18e-07
					Brain_Nucleus_accumbens_basal_ganglia	-0.196755	4.96e-06
					Adipose_Visceral_Omentum	-0.0999934	8.28e-06
					Artery_Tibial	-0.0665958	1.61e-05
					Breast_Mammary_Tissue	-0.0930982	1.86e-05
					Brain_Hypothalamus	-0.183634	2.64e-05
					Esophagus_Gastroesophageal_Junction	-0.114431	3.17e-05
					Brain_Frontal_Cortex_BA9	-0.168944	6.04e-05
					Artery_Aorta	-0.0810638	8.35e-05
					Skin_Sun_Exposed_Lower_leg	-0.0913384	8.13e-05
					Esophagus_Mucosa	-0.107227	0.000188975
				RSPO2	Esophagus_Mucosa	-0.304259	7.12e-13
					Artery_Tibial	-0.207671	6.18e-08
					Nerve_Tibial	-0.245126	7.36e-07
					Artery_Aorta	-0.224511	2.77e-06
	rs10841442	12	20213600	RP11-664H17.1	Artery_Aorta	-0.24818	2.12e-06
					Artery_Tibial	-0.144219	1.87e-05
					Testis	-0.26965	9.88e-05
	rs11049529	12	28471504	RP11-425D17.1	Esophagus_Muscularis	0.534356	7.36e-16
					Artery_Tibial	0.429303	1.64e-12
					Pituitary	0.661727	5.05e-12
					Adipose_Subcutaneous	0.390362	1.27e-09
					Skin_Sun_Exposed_Lower_leg	0.355035	1.45e-09
					Thyroid	0.311355	5.34e-09
					Colon_Sigmoid	0.426121	5.46e-08
					Breast_Mammary_Tissue	0.374791	1.26e-07
					Adipose_Visceral_Omentum	0.3632	2.96e-07
					Stomach	0.382607	1.16e-06
					Heart_Left_Ventricle	0.385735	1.3e-06
					Lung	0.275	5.37e-06
					Nerve_Tibial	0.311464	5.41e-06
					Skin_Not_Sun_Exposed_Suprapubic	0.288318	1.17e-05
					Colon_Transverse	0.323628	1.4e-05
					Brain_Nucleus_accumbens_basal_ganglia	0.478817	4.61e-05
					Artery_Aorta	0.318445	4.7e-05
					Heart_Atrial_Appendage	0.321543	6.08e-05
					Testis	0.355686	6.11e-05
					Adrenal_Gland	-0.335799	6.21e-06
					Colon_Sigmoid	-0.229017	1.39e-05
					Thyroid	-0.163489	1.43e-05
					Esophagus_Gastroesophageal_Junction	-0.212003	3.29e-05
				PTHLH	Lung	0.224798	3.93e-05
	rs6140442	20	7829397	TMX4	Whole_Blood	0.0900415	1.63e-05
