# Supplementary material for: Genetic insights into ossification of the posterior longitudinal ligament of the spine
Source: eLife. 2023 Jul 18;12:e86514. doi: 10.7554/eLife.86514 (PMC10353864; doi:10.7554/eLife.86514)
Supplement: Supplementary file 8. [file elife-86514-supp8.xlsx]

## Sheet: ST8
Supplementaly Table 8. Summary data-based Mendelian randomization
CHR	Gene	topSNP	Position	REF	ALT		GWAS				eQTL					TWMR
						ALT frequency	Beta	SE	P-value		Tissue	Beta	SE	P-value		Beta	SE	P_SMR	p_HEIDI
8	RSPO2	8:109117403:T:C	109117403	T	C	0.407181	-0.285399	0.0357436	1.40953e-15		Esophagus_Mucosa	-0.283077	0.0482579	4.4664e-09		1.0082	0.213271	2.27487e-06	0.329626
8	EMC2	8:109365100:G:A	109365100	G	A	0.373271	-0.233122	0.036497	1.68693e-10		Esophagus_Muscularis	0.252061	0.0316546	1.68111e-15		-0.924864	0.185622	6.2765e-07	0.00443301
8	RSPO2	8:109446828:T:C	109446828	T	C	0.500931	-0.235446	0.0357503	4.52325e-11		Artery_Tibial	-0.370694	0.049306	5.55243e-14		0.635149	0.128211	7.27277e-07	0.00837402
8	EMC2	8:109455863:C:T	109455863	C	T	0.374202	-0.238504	0.0359706	3.34491e-11		Esophagus_Mucosa	-0.385832	0.035665	2.82158e-27		0.618156	0.109346	1.57491e-08	0.00153966
8	EMC2	8:109487966:A:G	109487966	A	G	0.374069	-0.239485	0.0363271	4.3262e-11		Skin_Sun_Exposed_Lower_leg	-0.296748	0.0292347	3.2953e-24		0.807032	0.14597	3.22533e-08	0.00159073
8	EMC2	8:109560930:T:C	109560930	T	C	0.375665	-0.238152	0.0361796	4.6263e-11		Brain_Cerebellum	0.432791	0.0600558	5.74145e-13		-0.55027	0.11322	1.17278e-06	0.0356081
8	EMC2	8:109560930:T:C	109560930	T	C	0.375665	-0.238152	0.0361796	4.6263e-11		Esophagus_Gastroesophageal_Junction	0.284901	0.0462812	7.46687e-10		-0.835911	0.185919	6.92058e-06	0.0281364
8	EMC2	8:109587930:C:T	109587930	C	T	0.361436	-0.227556	0.0363326	3.77332e-10		Skin_Not_Sun_Exposed_Suprapubic	-0.257414	0.0326386	3.10065e-15		0.884006	0.180237	9.35723e-07	0.0046727
8	PLEC	8:145007947:G:A	145007947	G	A	0.185771	-0.236682	0.0467221	4.06808e-07		Adipose_Visceral_Omentum	-0.362919	0.0387105	6.90347e-21		0.652163	0.146331	8.321e-06	0.983225
8	PLEC	8:145010305:A:G	145010305	A	G	0.186702	-0.242641	0.0467383	2.08625e-07		Lung	-0.546923	0.0416262	1.97067e-39		0.443647	0.0918858	1.37739e-06	0.308536
8	PLEC	8:145010305:A:G	145010305	A	G	0.186702	-0.242641	0.0467383	2.08625e-07		Testis	-0.436113	0.0381653	3.06707e-30		0.556372	0.117712	2.28361e-06	0.442981
8	PLEC	8:145012206:G:A	145012206	G	A	0.187367	-0.244124	0.0467508	1.77172e-07		Adrenal_Gland	-0.557238	0.0593057	5.66581e-21		0.438097	0.0959829	5.01113e-06	0.653839
8	PLEC	8:145012466:A:G	145012466	A	G	0.186436	-0.242045	0.0467409	2.23751e-07		Cells_Transformed_fibroblasts	-0.665582	0.0428081	1.64033e-54		0.363659	0.0740183	8.96473e-07	0.599323
8	PLEC	8:145021428:G:C	145021428	G	C	0.189628	-0.225577	0.0458899	8.84996e-07		Adipose_Subcutaneous	-0.352329	0.0298634	3.99542e-32		0.640247	0.1411	5.69168e-06	0.665281
8	PLEC	8:145021428:G:C	145021428	G	C	0.189628	-0.225577	0.0458899	8.84996e-07		Nerve_Tibial	-0.48197	0.0372631	2.88427e-38		0.468032	0.101857	4.32804e-06	0.458371
8	PLEC	8:145021428:G:C	145021428	G	C	0.189628	-0.225577	0.0458899	8.84996e-07		Thyroid	-0.535266	0.0338195	2.02154e-56		0.421431	0.0897726	2.67361e-06	0.499929
12	RP11-967K21.1	12:28392634:A:T	28392634	A	T	0.686436	-0.226379	0.0356472	2.14568e-10		Colon_Transverse	-0.395194	0.0629509	3.4337e-10		0.57283	0.128306	8.02287e-06	0.226157
SMR, summary data-based Mendelian randomization; CHR, chromosome; REF, reference; ALT, alternative; GWAS, genome wide association study; eQTL, expression quantitative trait locus; SE, standard error; HEIDI, heterogeneity in dependent instruments.
Significant gene-phenotype pairs (PTWMR < 8.4e-6 and PHEIDI < 0.05) are represented by bold font.
