# Supplementary material for: Genetic insights into ossification of the posterior longitudinal ligament of the spine
Source: eLife. 2023 Jul 18;12:e86514. doi: 10.7554/eLife.86514 (PMC10353864; doi:10.7554/eLife.86514)
Supplement: Supplementary file 9. [file elife-86514-supp9.xlsx]

## Sheet: ST9
Supplementaly Table 9. Enrichment analysis for active enhancer by cell groups
Cell group	Enrichment P-value	FDR*
Connective/bone	0.00079923	0.00747799
Immune/hematopoietic	0.0014956	0.00747799
Skeletal muscle	0.0592018	0.197339
Other	0.0863097	0.215774
Gastrointestinal	0.123111	0.229508
Cardiovascular	0.137705	0.229508
Central nervous system	0.266251	0.36861
Liver	0.294888	0.36861
Kidney	0.395591	0.439546
Adrenal/pancreas	0.501446	0.501446
FDR, false discovery rate.
*estimated using Benjamini–Hochberg method.
