# Supplementary material for: Genetic insights into ossification of the posterior longitudinal ligament of the spine
Source: eLife. 2023 Jul 18;12:e86514. doi: 10.7554/eLife.86514 (PMC10353864; doi:10.7554/eLife.86514)
Supplement: Supplementary file 10. [file elife-86514-supp10.xlsx]

## Sheet: ST10
Supplementaly Table 10. Enrichment analysis for active enhancer by cell types
a. Connective/bone cell group
Cell	Mark	Enrichment P-value	FDR*
Chondrogenic differentiation cell	H3K27ac	0.000731381	0.00438829
Osteoblast	H3K27ac	0.0092801	0.0278403
Penis foreskin fibroblast primary	H3K4me3	0.0330986	0.0661972
Penis foreskin fibroblast primary	H3K4me1	0.0546078	0.0819117
Breast fibroblast primary	H3K4me1	0.347676	0.417212
Breast fibroblast primary	H3K4me3	0.757622	0.757622
FDR, False discovery rate.
*estimated using Benjamini–Hochberg method.
b. Immune/hematopoietic cell group
Cell	Mark	Enrichment P-value	FDR*
CD8 Memory Primary Cells	H3K4me1	0.0120834	0.340807
CD4+ CD25- CD45RA+ Naïve Primary Cells	H3K4me1	0.024924	0.340807
CD4+ CD25- IL17- PMA-Ionomycin stimulated MACS purified Th Primary Cells peaks	H3K4me1	0.026697	0.340807
CD3 Primary Cells	H3K27ac	0.0284982	0.340807
CD4 Naive Primary Cells peaks	H3K4me1	0.0286004	0.340807
UCSD.Spleen peaks	H3K4me1	0.0347512	0.340807
CD4+ CD25- Th Primary Cells peaks	H3K4me1	0.0404522	0.340807
CD4 Memory Primary Cells peaks	H3K4me1	0.0406934	0.340807
CD8 Naive Primary Cells peaks	H3K4me1	0.0617491	0.459688
UW.CD56 Primary Cells peaks	H3K4me1	0.0735693	0.492915
CD4+ CD25- CD45RO+ Memory Primary Cells peaks	H3K4me1	0.0999291	0.524763
UCSF-UBC.CD8 Naive Primary Cells peaks	H3K4me1	0.104903	0.524763
UW.CD3 Primary Cells peaks	H3K4me1	0.105792	0.524763
CD4+ CD25int CD127+ Tmem Primary Cells peaks	H3K4me1	0.109652	0.524763
Th1	H3K27ac	0.121395	0.542233
CD3 Primary Cells peaks	H3K4me1	0.148975	0.620213
UW.CD14 Primary Cells peaks	H3K4me3	0.157367	0.620213
CD4+ CD25- IL17+ PMA-Ionomcyin stimulated Th17 Primary Cells peaks	H3K4me1	0.195552	0.727888
CD34 Primary Cells peaks	H3K4me1	0.213307	0.729929
UW.CD19 Primary Cells peaks	H3K4me1	0.225209	0.729929
CD25- IL17- Th stim MACS	H3K27ac	0.237855	0.729929
UW.CD4 Primary Cells peaks	H3K4me3	0.258737	0.729929
Mobilized CD34 Primary Cells peaks	H3K4me1	0.258961	0.729929
UW.Fetal Thymus peaks	H3K4me1	0.26706	0.729929
UW.CD19 Primary Cells peaks	H3K4me3	0.272361	0.729929
Th0	H3K27ac	0.303943	0.739401
CD4 Memory Primary Cells peaks	H3K4me3	0.320935	0.739401
UCSD.Thymus peaks	H3K4me1	0.322146	0.739401
CD4+ CD25+ CD127- Treg Primary Cells peaks	H3K4me1	0.333101	0.739401
UCSF-UBC.Peripheral Blood Mononuclear Primary Cells peaks	H3K4me3	0.34466	0.739401
CD4+ CD25- Th Primary Cells peaks	H3K4me3	0.354706	0.739401
CD4+ CD25int CD127+ Tmem Primary Cells peaks	H3K4me3	0.360825	0.739401
UCSF-UBC.CD8 Naive Primary Cells peaks	H3K9ac	0.364183	0.739401
CD4+ CD25- IL17+ PMA-Ionomcyin stimulated Th17 Primary Cells peaks	H3K4me3	0.384799	0.743004
CD25- CD45RA+ naive	H3K27ac	0.394447	0.743004
CD19 Primary Cells peaks	H3K4me1	0.402095	0.743004
adult CD20	H3K27ac	0.410316	0.743004
UW.CD14 Primary Cells peaks	H3K4me1	0.435854	0.764982
CD4+ CD25+ CD127- Treg Primary Cells peaks	H3K4me3	0.475024	0.764982
CD4+ CD25- CD45RO+ Memory Primary Cells peaks	H3K4me3	0.490224	0.764982
CD4+ CD25- CD45RA+ Naive Primary Cells peaks	H3K4me3	0.501459	0.764982
CD25+ CD127- Treg	H3K27ac	0.504535	0.764982
CD25int CD127+ Tmem	H3K27ac	0.511599	0.764982
UW.CD3 Primary Cells peaks	H3K4me3	0.513396	0.764982
CD25- IL17+ Th17 stim	H3K27ac	0.520701	0.764982
Mobilized CD34	H3K27ac	0.528026	0.764982
UCSF-UBC.CD8 Naive Primary Cells peaks	H3K4me3	0.544754	0.764982
CD15 Primary Cells peaks	H3K4me1	0.551666	0.764982
UW.CD8 Primary Cells peaks	H3K4me3	0.559464	0.764982
CD4 Naive Primary Cells peaks	H3K4me3	0.571612	0.76596
adult CD14	H3K27ac	0.625787	0.822112
CD8 Memory Primary Cells peaks	H3K4me3	0.660989	0.828857
CD4+ CD25- IL17- PMA-Ionomycin stimulated MACS purified Th Primary Cells peaks	H3K4me3	0.670611	0.828857
CD3 Primary Cells peaks	H3K4me3	0.677339	0.828857
Th2	H3K27ac	0.680405	0.828857
Mobilized CD34 Primary Cells peaks	H3K4me3	0.735878	0.880426
UCSF-UBC.Peripheral Blood Mononuclear Primary Cells peaks	H3K9ac	0.763728	0.887773
CD19	H3K27ac	0.76852	0.887773
CD19 Primary Cells peaks	H3K4me3	0.818959	0.915753
CD8 Naive Primary Cells peaks	H3K4me3	0.820078	0.915753
UW.CD56 Primary Cells peaks	H3K4me3	0.893097	0.952793
CD34 Primary Cells peaks	H3K4me3	0.919873	0.952793
Treg Primary Cells peaks	H3K4me3	0.921736	0.952793
CD15 Primary Cells peaks	H3K4me3	0.935854	0.952793
UW.Fetal Thymus peaks	H3K4me3	0.936694	0.952793
UCSF-UBC.Peripheral Blood Mononuclear Primary Cells peaks	H3K4me1	0.938572	0.952793
UCSD.Spleen peaks	H3K4me3	0.986391	0.986391
FDR, False discovery rate.
*estimated using Benjamini–Hochberg method.
