# Supplementary material for: Genetic insights into ossification of the posterior longitudinal ligament of the spine
Source: eLife. 2023 Jul 18;12:e86514. doi: 10.7554/eLife.86514 (PMC10353864; doi:10.7554/eLife.86514)
Supplement: Supplementary file 11. [file elife-86514-supp11.xlsx]

## Sheet: ST11
Supplementaly Table 11. Genome-wide significant loci in cervical/thoracic OPLL
SNP	CHR	Position	Gene*	REF / ALT	OPLL	P	OR (95%CI)	Phet#	GWAS set 1				GWAS set 2				GWAS set 3
									ALT allele frequency		P	OR (95%CI)	ALT allele frequency		P	OR (95%CI)	ALT allele frequency		P	OR (95%CI)
									Case	Control			Case	Control			Case	Control
Cervical OPLL
rs191235032	8 (p22)	16156154	MSR1, FGF20 (intergenic)	T /C	ALL	0.001597	1.87 (1.27-2.75)	0.1288	0.00835315	0.00516063	0.0485315	1.71 (1.00-2.91)	0.0121917	0.00516676	0.00326724	2.41 (1.34-4.33)	0.00210051	0.00569546	0.217916	0.26 (0.03-2.20)
					Cervical	7.11e-09	3.50(2.29-5.35)	0.9888	0.0166562	0.00516063	7.55e-06	3.51(2.03-6.08)	0.0172721	0.00516676	0.000244026	3.49(1.79-6.79)	-	-	-	-
					Thoracic	0.1873	0.45 (0.14-1.48)	0.7503	0.00249986	0.00516063	0.384109	0.41 (0.05-3.06)	0.00457711	0.00516676	0.84564	0.82 (0.10-6.39)	0.00210051	0.00569546	0.217916	0.26 (0.03-2.20)
rs10770607	12 (p12.2)	20180241	LINC02398 (ncRNA_intronic)	C / T	ALL	3.52e-11	0.80 (0.75-0.85)	0.3035	0.436858	0.501316	4.12e-08	0.78 (0.71-0.85)	0.437585	0.492214	0.0001181	0.79 (0.70-0.89)	0.445351	0.473325	0.248468	0.90 (0.76-1.07)
					Cervical	8.33e-09	0.74(0.67-0.82)	0.789	0.425082	0.501316	2.6e-06	0.73(0.64-0.83)	0.427808	0.492214	0.000830219	0.75(0.64-0.89)	-	-	-	-
					Thoracic	0.001057	0.83 (0.74-0.93)	0.1601	0.419722	0.501316	0.000436884	0.72 (0.59-0.86)	0.46532	0.492214	0.40616	0.89 (0.69-1.16)	0.445351	0.473325	0.248468	0.90 (0.76-1.07)
rs201971301	20 (p12.3)	7768713	MIR8062, HAO1 (intergenic)	T / A	ALL	4.9e-14	1.39 (1.27-1.51)	0.03903	0.218118	0.162734	1.06e-11	1.49 (1.33-1.67)	0.209142	0.165433	4.08e-05	1.38 (1.18-1.60)	0.168632	0.159678	0.656067	1.06 (0.83-1.34)
					Cervical	2.45e-08	1.43(1.26-1.63)	0.4895	0.219399	0.162734	1.31e-06	1.48(1.26-1.74)	0.206979	0.165433	0.00424515	1.35(1.10-1.67)	-	-	-	-
					Thoracic	0.02878	1.18 (1.02-1.38)	0.1418	0.211997	0.162734	0.00357312	1.41 (1.12-1.78)	0.164668	0.165433	0.981824	1.00 (0.70-1.45)	0.168632	0.159678	0.656067	1.06 (0.83-1.34)
Thoracic OPLL
rs570441876	1 (1p36.21)	15264981	KAZN (intronic)	T / G	ALL	0.001146	2.50 (1.44-4.35)	0.01418	0.00695172	0.00515509	0.124838	1.90 (0.84-4.32)	0.00669327	0.00636879	0.830028	1.12 (0.40-3.18)	0.0133158	0.00462705	4.41448e-05	9.34 (3.20-27.29)
					Cervical	0.817	1.13(0.41-3.14)	0.2794	0.00640503	0.00515509	0.444881	1.60(0.48-5.32)	0.0045212	0.00636879	0.42371	0.45(0.06-3.18)	-	-	-	-
					Thoracic	1.063e-08	6.90 (3.56-13.37)	0.6308	0.0141577	0.00515509	0.000248066	7.03 (2.48-19.94)	0.0137663	0.00636879	0.060143	3.91 (0.94-16.20)	0.0133158	0.00462705	4.41448e-05	9.34 (3.20-27.29)
rs74707424	1 (p36.12)	22853414	ZBTB40 (UTR3)	G / A	ALL	6.185e-05	1.73 (1.32-2.26)	0.7279	0.0201298	0.0150093	0.0120882	1.60 (1.11-2.31)	0.0190575	0.0136136	0.0281992	1.74 (1.06-2.85)	0.0230224	0.0123247	0.0183069	2.16 (1.14-4.09)
					Cervical	0.08737	1.45(0.95-2.23)	0.341	0.0162074	0.0150093	0.522519	1.21(0.68-2.15)	0.0203483	0.0136136	0.0644173	1.84(0.96-3.50)	-	-	-	-
					Thoracic	2.024e-08	2.88 (1.99-4.17)	0.4894	0.0386117	0.0150093	2.54156e-06	3.58 (2.10-6.08)	0.0284953	0.0136136	0.0225988	2.76 (1.15-6.60)	0.0230224	0.0123247	0.0183069	2.16 (1.14-4.09)
rs182641792	8 (q11.21)	49409078	UBE2V2, LOC101929268 (intergenic)	G / A	ALL	8.961e-05	1.94 (1.39-2.71)	0.006435	0.0129825	0.00662878	0.0014567	1.98 (1.30-3.02)	0.00445562	0.00709354	0.28301	0.62 (0.26-1.49)	0.0192508	0.00558393	0.000168755	3.77 (1.89-7.53)
					Cervical	0.4067	1.27(0.73-2.21)	0.3864	0.00969492	0.00662878	0.242924	1.48(0.76-2.88)	0.00621629	0.00709354	0.784093	0.87(0.31-2.41)	-	-	-	-
					Thoracic	3.146e-08	3.48 (2.24-5.42)	0.2308	0.0251593	0.00662878	1.06831e-05	3.99 (2.16-7.40)	0.00659495	0.00709354	0.914438	0.92 (0.19-4.52)	0.0192508	0.00558393	0.000168755	3.77 (1.89-7.53)
rs75660571	12 (p13.1)	13356404	EMP1 (intronic)	A / G	ALL	2.175e-05	1.91 (1.42-2.57)	0.008291	0.0127918	0.00977656	0.171466	1.36 (0.88-2.10)	0.0159988	0.00969903	0.0425683	1.73 (1.02-2.94)	0.0241086	0.00809008	3.3021e-06	4.53 (2.40-8.57)
					Cervical	0.7176	0.90(0.50-1.60)	0.6375	0.0083173	0.00977656	0.559749	0.79(0.37-1.72)	0.0108875	0.00969903	0.910442	1.05(0.44-2.51)	-	-	-	-
					Thoracic	3.19e-08	3.23 (2.13-4.89)	0.3804	0.021881	0.00977656	0.00907442	2.42 (1.25-4.71)	0.0221984	0.00969903	0.0433794	2.71 (1.03-7.11)	0.0241086	0.00809008	3.3021e-06	4.53 (2.40-8.57)
rs569120301	19 (p13.2)	13295879	IER2, CACNA1A (intergenic)	A / G	ALL	4.138e-07	1.49 (1.28-1.74)	0.02448	0.0783274	0.0708475	0.0654168	1.23 (0.99-1.54)	0.0824103	0.0645908	0.00183099	1.55 (1.18-2.04)	0.10002	0.0619641	7.98104e-06	2.16 (1.54-3.02)
					Cervical	0.1116	1.22(0.95-1.57)	0.3207	0.0736692	0.0708475	0.571176	1.10(0.79-1.53)	0.0780276	0.0645908	0.0738015	1.42(0.97-2.09)	-	-	-	-
					Thoracic	2.15e-08	1.96 (1.55-2.48)	0.6096	0.0987032	0.0708475	0.00120393	1.92 (1.29-2.84)	0.0815835	0.0645908	0.166096	1.53 (0.84-2.78)	0.10002	0.0619641	7.98104e-06	2.16 (1.54-3.02)
rs577395034	19 (p12)	21115881	ZNF85 (intronic)	C / T	ALL	0.001319	2.19 (1.36-3.54)	0.01164	0.00725551	0.00581884	0.188986	1.59 (0.80-3.18)	0.00701243	0.00603626	0.682198	1.21 (0.48-3.05)	0.0145886	0.00472118	3.14128e-05	7.58 (2.92-19.66)
					Cervical	0.6851	1.19(0.51-2.78)	0.4278	0.00486803	0.00581884	0.738512	0.80(0.22-2.93)	0.00829941	0.00603626	0.409008	1.60(0.52-4.93)	-	-	-	-
					Thoracic	3.269e-08	5.63 (3.05-10.40)	0.2452	0.0168584	0.00581884	6.26595e-05	5.76 (2.44-13.59)	0.00601775	0.00603626	0.967675	0.95 (0.10-8.87)	0.0145886	0.00472118	3.14128e-05	7.58 (2.92-19.66)
rs149869712	23 (q23.31)	87846779	KLHL4, CPXCR1 (intergenic)	C / T	ALL	0.0002687	1.74 (1.29-2.35)	0.952	0.0128928	0.00803826	0.01959	1.63 (1.08-2.44)	0.0127976	0.00724307	0.04601	1.74 (1.01-3.00)	0.0143599	0.00778421	0.03674	2.22 (1.05-4.70)
					Cervical	0.3416	1.29(0.76-2.18)	0.5009	0.0082395	0.00803826	0.8135	1.09(0.53-2.25)	0.0100863	0.00724307	0.256	1.56(0.72-3.36)	-	-	-	-
					Thoracic	2.198e-11	3.48 (2.42-5.02)	0.7406	0.033097	0.00803826	2.748e-08	4.05 (2.47-6.63)	0.0268426	0.00724307	0.0007457	3.91 (1.77-8.64)	0.0143599	0.00778421	0.03674	2.22 (1.05-4.70)
rs138997780	23 (q27.3)	142679687	SPANXN3, SLITRK4 (intergenic)	C / T	ALL	0.0003039	1.62 (1.25-2.10)	0.7136	0.0132213	0.00739465	0.01571	1.52 (1.08-2.12)	0.014784	0.0063625	0.002679	1.96 (1.26-3.05)	0.00564341	0.00858642	0.8428	0.88 (0.26-2.97)
					Cervical	0.09191	1.43(0.94-2.16)	0.5639	0.00847247	0.00739465	0.6814	1.13(0.64-1.98)	0.0131073	0.0063625	0.04184	1.88(1.02-3.45)	-	-	-	-
					Thoracic	4.347e-08	2.77 (1.93-4.00)	0.2579	0.0380019	0.00739465	6.227e-09	3.43 (2.26-5.21)	0.0128924	0.0063625	0.2419	1.80 (0.67-4.80)	0.00564341	0.00858642	0.8428	0.88 (0.26-2.97)
rs17253481	23 (q28)	150433004	GPR50, VMA21 (intergenic)	T / G	ALL	0.001105	1.53 (1.19-1.98)	0.5782	0.0190372	0.0137199	0.02728	1.49 (1.05-2.12)	0.0163146	0.0135372	0.4327	1.22 (0.74-2.01)	0.0216536	0.010925	0.005942	2.20 (1.25-3.84)
					Cervical	0.5607	1.15(0.72-1.82)	0.3093	0.0145529	0.0137199	0.7613	1.09(0.61-1.96)	0.0144104	0.0135372	0.5761	1.24(0.58-2.65)	-	-	-	-
					Thoracic	9.82e-09	2.62 (1.88-3.64)	0.7962	0.0365505	0.0137199	4.764e-06	3.08 (1.90-4.98)	0.0262672	0.0135372	0.02221	2.43 (1.13-5.18)	0.0216536	0.010925	0.005942	2.20 (1.25-3.84)
* Gene in or near resion of association.
# Phet was derived from a Cochran’s Q-test for heterogeneity.
OPLL, ossification of the posterior longitudinal ligament of the spine; CHR, chromosome; REF, reference; ALT, alternative; OR, odds ratio; CI, confidence interval; GWAS, genome wide association study.
