# Supplementary material for: Genetic insights into ossification of the posterior longitudinal ligament of the spine
Source: eLife. 2023 Jul 18;12:e86514. doi: 10.7554/eLife.86514 (PMC10353864; doi:10.7554/eLife.86514)
Supplement: Supplementary file 12. [file elife-86514-supp12.xlsx]

## Sheet: ST12
Supplementaly Table 12. Details of genes analyzed by gene expression analysis
Study	Candidate genes	Bulk RNA sequencing										Single cell RNA sequencing
		Analysis 1 (GSE188760)					Analysis 2 (GSE188759)					Analysis 3 (GSE126060)					Analysis 4 (GSE188758)
		Gene information		Expression			Gene information		Expression			Gene information		Expression			Gene information		Expression
		Yes	No	Yes	No		Yes	No	Yes	No		Yes	No	Yes	No		Yes	No	Yes	No
GWAS meta-analysis for OPLL (ALL-OPLL)	19 genes (SNX17, LOC105375075, SUPT3H, RSPO2, LINC00536, EIF3H, TMEM135, AEBP2, LINC02398, CCDC91, FAR2, L2HGDH, FLJ22447, HIF1A-AS1, AGBL1, LINC00052, WWP2, MIR8062, HAO1)	17	2 (LOC105375075, FLJ22447)	11	6 (LINC00536, LINC02398, HIF1A-AS1, LINC00052, MIR8062, HAO1)		17	2 (LOC105375075, FLJ22447)	12	5 (LINC00536, LINC02398, LINC00052, MIR8062, HAO1)		11	8 (LOC105375075, SUPT3H, LINC00536, LINC02398, FLJ22447, HIF1A-AS1, LINC00052, MIR8062)	10	1 (AGBL1)		11	8 (LOC105375075, SUPT3H, LINC00536, LINC02398, FLJ22447, HIF1A-AS1, LINC00052, MIR8062)	11	0
Gene-based association analysis	2 genes* (EIF3E, EMC2)	2	0	2	0		2	0	2	0		2	0	2	0		2	0	2	0
SMR	2 genes# (PLEC, RP11-967K21.1)	1	1 (RP11-967K21.1)	1	0		1	1 (RP11-967K21.1)	1	0		1	1 (RP11-967K21.1)	1	0		1	1 (RP11-967K21.1)	1	0
Subtype-stratified GWAS meta-analysis
GWAS meta-analysis for cervical OPLL	2 genes† (MSR1, FGF20)	2	0	2	0		2	0	2	0		2	0	1	1 (FGF20)		2	0	2	0
GWAS meta-analysis for thoracic OPLL	14 genes (KAZN, ZBTB40, UBE2V2, LOC101929268, EMP1, IER2, CACNA1A, ZNF85, KLHL4, CPXCR1, SPANXN3, SLITRK4 , GPR50, VMA21)	13	1 (LOC101929268)	10	3 (CPXCR1, SPANXN3, GPR50)		13	1 (LOC101929268)	11	2 (CPXCR1, SPANXN3)		11	3 (LOC101929268, ZNF85, SPANXN3)	10	1 (CPXCR1)		11	3 (LOC101929268, ZNF85, SPANXN3)	10	1 (CPXCR1)
GWAS, genome wide association study; OPLL, ossification of the posterior longitudinal ligament of the spine; SMR, summary data-based Mendelian randomization.
*TMEM135, which is also a candidate gene in the ALL-OPLL GWAS meta-analysis, was excluded.
# RSPO2, which is also a candidate gene in the ALL-OPLL GWAS meta-analysis, was excluded.
† LINC02398, MIR8062, and HAO1, which are also candidate genes in the ALL-OPLL GWAS meta-analysis, were excluded.
