# Supplementary material for: Genetic insights into ossification of the posterior longitudinal ligament of the spine
Source: eLife. 2023 Jul 18;12:e86514. doi: 10.7554/eLife.86514 (PMC10353864; doi:10.7554/eLife.86514)
Supplement: Supplementary file 13. [file elife-86514-supp13.xlsx]

## Sheet: ST13
Supplementaly Table 13. Genetic correlation between OPLL and other disease or quantitative trait
Trait	rg	se	z	P value	FDR*
Body mass index	0.2294	0.0438	5.2341	1.66e-07	1.5936e-05
Cerebral aneurysm	-0.3105	0.0943	-3.2929	0.001	0.0352
Type 2 diabetes	0.1457	0.0445	3.2746	0.0011	0.0352
Osteoporosis	-0.4295	0.1395	-3.0785	0.0021	0.0504
Uterine fibroid	0.3143	0.1124	2.7952	0.0052	0.09984
Total protein	-0.1325	0.0614	-2.1586	0.0309	0.474
Cataract	0.2517	0.1214	2.0725	0.0382	0.474
HDL-cholesterol	-0.1368	0.0665	-2.0585	0.0395	0.474
LDL-cholesterol	-0.1776	0.0913	-1.9455	0.0517	0.5472
Esophageal cancer	-0.1991	0.1069	-1.8628	0.0625	0.5472
Gastric cancer	0.2075	0.1117	1.858	0.0632	0.5472
Lymphocyte	0.1455	0.0799	1.8223	0.0684	0.5472
Rheumatoid arthritis	-0.1564	0.0914	-1.7105	0.0872	0.554541
Height	0.075	0.0442	1.6971	0.0897	0.554541
Hematocrit	0.1072	0.064	1.6748	0.094	0.554541
Basophil	-0.1397	0.0835	-1.6732	0.0943	0.554541
Pulmonary tuberculosis	-0.33	0.1995	-1.6537	0.0982	0.554541
Lactate dehydrogenase	0.146	0.0904	1.6147	0.1064	0.567467
Graves' disease	-0.1436	0.091	-1.5784	0.1145	0.570327
Sodium	0.0925	0.0608	1.5199	0.1285	0.570327
eGFR	-0.0857	0.0565	-1.5165	0.1294	0.570327
Hemoglobin	0.0997	0.066	1.5112	0.1307	0.570327
Non-albumin protein	-0.0925	0.0632	-1.4633	0.1434	0.578489
Red blood cell	0.0761	0.0522	1.4576	0.1449	0.578489
Eosinophil	-0.1069	0.0757	-1.4123	0.1579	0.578489
Systolic blood pressure	-0.0902	0.0642	-1.4053	0.1599	0.578489
Hemoglobin A1c	0.1042	0.0746	1.3959	0.1627	0.578489
Potassium	-0.0796	0.0596	-1.335	0.1819	0.623657
Total cholesterol	-0.0985	0.0757	-1.3006	0.1934	0.634529
Platelet	-0.0653	0.0512	-1.2748	0.2024	0.634529
Alkaline phosphatase	-0.0766	0.0604	-1.2678	0.2049	0.634529
Mean arterial pressure	-0.0784	0.0638	-1.2281	0.2194	0.653964
Hepatocellular carcinoma	0.7272	0.5991	1.2138	0.2248	0.653964
IVS	0.1682	0.1436	1.1711	0.2416	0.665417
Serum creatinine	0.065	0.0556	1.1685	0.2426	0.665417
Fractional shortening	0.1408	0.1273	1.1055	0.269	0.692919
Asthma	0.0991	0.091	1.0892	0.2761	0.692919
Pulse pressure	-0.0801	0.0757	-1.0588	0.2897	0.692919
ZTT	0.1671	0.1601	1.044	0.2965	0.692919
Calcium	-0.0881	0.0845	-1.0433	0.2968	0.692919
PT	0.0989	0.0977	1.0119	0.3116	0.692919
Ejection fraction	0.1236	0.1252	0.9871	0.3236	0.692919
Nephrotic syndrome	0.2094	0.2152	0.9729	0.3306	0.692919
Diastolic blood pressure	-0.0648	0.0671	-0.9668	0.3337	0.692919
Triglyceride	0.0546	0.0578	0.9449	0.3447	0.692919
Creatine kinase	0.0646	0.0692	0.933	0.3508	0.692919
Albumin	-0.0647	0.0704	-0.9192	0.358	0.692919
Coronary artery disease	0.0475	0.0523	0.9073	0.3643	0.692919
Albumin/globulin ratio	0.0555	0.0622	0.8926	0.3721	0.692919
Prostate cancer	-0.0612	0.0693	-0.8833	0.3771	0.692919
Cervical cancer	0.1295	0.1473	0.8791	0.3794	0.692919
COPD	-0.0909	0.1038	-0.8757	0.3812	0.692919
Lung cancer	0.1528	0.1796	0.8505	0.395	0.692919
Endometrial cancer	-0.1348	0.1619	-0.8322	0.4053	0.692919
Monocyte	0.0554	0.068	0.8153	0.4149	0.692919
LVDs	-0.0762	0.0941	-0.8093	0.4184	0.692919
Pollinosis	0.0951	0.1212	0.7844	0.4328	0.692919
Blood urea nitrogen	-0.2306	0.3003	-0.7677	0.4426	0.692919
Pancreatic cancer	0.0488	0.0635	0.7679	0.4426	0.692919
Glaucoma	0.0715	0.0952	0.7506	0.4529	0.692919
Relative wall thickness	0.0959	0.1302	0.7366	0.4614	0.692919
AST	-0.0452	0.0617	-0.733	0.4636	0.692919
C-reactive protein	0.121	0.1652	0.7327	0.4637	0.692919
Chronic hepatitis B	0.1027	0.1418	0.7244	0.4688	0.692919
Fibrinogen	-0.2172	0.3017	-0.7199	0.4716	0.692919
Arrhythmia	-0.0451	0.0642	-0.7021	0.4826	0.692919
Total bilirubin	0.048	0.0685	0.7006	0.4836	0.692919
Cirrhosis	0.1536	0.2294	0.6698	0.503	0.710118
Chloride	0.0425	0.0673	0.6312	0.5279	0.719867
Ovarian cancer	-0.2794	0.4487	-0.6227	0.5335	0.719867
Urolithiasis	-0.0527	0.0848	-0.621	0.5346	0.719867
APTT	-0.0626	0.1021	-0.613	0.5399	0.719867
Chronic hepatitis C	-0.0726	0.1261	-0.5752	0.5651	0.743145
Epilepsy	-0.1126	0.2093	-0.5381	0.5905	0.766054
Keloid	-0.0597	0.1146	-0.521	0.6024	0.771072
Drug eruption	-0.3158	0.6232	-0.5068	0.6123	0.773432
Breast cancer	0.041	0.0927	0.4425	0.6581	0.773916
MCHC	-0.0317	0.072	-0.44	0.6599	0.773916
Ischemic stroke	-0.0348	0.081	-0.4294	0.6676	0.773916
MCH	-0.0211	0.0492	-0.4277	0.6689	0.773916
γ-glutamyl_transferase	-0.0214	0.0504	-0.424	0.6716	0.773916
Phosphorus	-0.0493	0.119	-0.414	0.6789	0.773916
Posterior wall thickness	0.0505	0.1232	0.4101	0.6818	0.773916
Colorectal cancer	-0.0345	0.0853	-0.4039	0.6863	0.773916
Blood sugar	0.0301	0.0753	0.3996	0.6894	0.773916
Neutrophil	-0.0233	0.0591	-0.3944	0.6933	0.773916
LVDd	-0.0315	0.0906	-0.3481	0.7277	0.800182
MCV	-0.0156	0.0459	-0.3405	0.7335	0.800182
LVM	0.0285	0.0984	0.2894	0.7723	0.833043
LVMI	-0.0261	0.1147	-0.2273	0.8202	0.87488
Congestive heart failure	0.0184	0.1011	0.1818	0.8557	0.883915
Uric acid	0.0091	0.0512	0.1776	0.859	0.883915
Atopic dermatitis	-0.0167	0.0989	-0.1693	0.8655	0.883915
ALT	0.0109	0.0643	0.1694	0.8655	0.883915
White blood cell count	0.0042	0.0513	0.0827	0.9341	0.943933
Peripheral artery disease	0.0032	0.0872	0.0372	0.9703	0.9703
COPD, chronic obstructive pulmonary disease; HDL, high density lipoprotein; LDL, low density lipoprotein; eGFR, estimated glemerular filtration rate; IVS, interventricular septum thickness; PT, prothrombin time; ZTT, zinc sulfate turbidity test; LVDs, left ventricular internal dimension in systole; AST, aspartate aminotransferase; APTT, activated partial thromboplastin time; MCH, mean corpuscular…
*estimated using Benjamini–Hochberg method.
