# Supplementary material for: Genetic insights into ossification of the posterior longitudinal ligament of the spine
Source: eLife. 2023 Jul 18;12:e86514. doi: 10.7554/eLife.86514 (PMC10353864; doi:10.7554/eLife.86514)
Supplement: Supplementary file 14. [file elife-86514-supp14.xlsx]

## Sheet: ST14
Supplementaly Table 14. Instrument variables to analyze the causal effect on OPLL
Trait	Study	Study design	Ethnicity	No. of significant SNPs	No. of SNPs used as instrument variables
					ALL-OPLL	Cervical-OPLL	Thoracic-OPLL
Body mass index	Akiyama et al. Nat Genet 2017	GWAS meta-analysis	Trans-ethnic (Japanese and Europeans)	163	160	160	160
			Japanese*	77	75	75	75
Type 2 diabetes	Spracklen et al. Nature 2020	GWAS meta-analysis	East asian	183	178	178	178
Cerebral aneurysm	Bakker et al. Nat Genet 2020	GWAS meta-analysis	Trans-ethnic (European and East asian)	17	15	15	15
Bone mineral density	Kemp et al. Nat Genet 2017	GWAS	Europeans	307	241	241	241
OPLL, ossification of the posterior longitudinal ligament; GWAS, genome wide association study.
*used for sensitivity analysis.
