# Supplementary material for: Genetic insights into ossification of the posterior longitudinal ligament of the spine
Source: eLife. 2023 Jul 18;12:e86514. doi: 10.7554/eLife.86514 (PMC10353864; doi:10.7554/eLife.86514)
Supplement: Supplementary file 15. [file elife-86514-supp15.xlsx]

## Sheet: ST15
Supplementaly Table 15. MR analyses inferring causality of body mass index, type 2 diabetes, cerebral aneurysm, and bone mineral density on OPLL
Exposure	Outcome	MR-method	Result			Result (Replication data added)
			Beta (SE)	P-value		Beta (SE)	P-value
Body mass index	ALL-OPLL	IVW	0.613 (0.173)	0.00039478		0.752 (0.160)	2.74e-06
		MR-Egger	0.838 (0.443)	0.060178		1.096 (0.410)	0.0082372
		Simple median	0.417 (0.238)	0.0796094		0.515 (0.219)	0.0188107
		Weighted median	0.636 (0.240)	0.0078804		0.975 (0.231)	2.35e-05
	Cervical-OPLL	IVW	0.451 (0.246)	0.0661257		-	-
		MR-Egger	0.168 (0.632)	0.791247		-	-
		Simple median	0.324 (0.347)	0.350832		-	-
		Weighted median	0.070 (0.395)	0.858612		-	-
	Thoracic-OPLL	IVW	1.304 (0.293)	8.34e-06		1.489 (0.258)	8.14e-09
		MR-Egger	3.679 (0.708)	6.28e-07		3.657 (0.625)	2.75e-08
		Simple median	0.814 (0.395)	0.039263		1.241 (0.360)	0.000571812
		Weighted median	1.976 (0.404)	9.95e-07		2.101 (0.372)	1.61e-08
Type 2 diabetes	ALL-OPLL	IVW	0.092 (0.050)	0.0636642		0.092 (0.047)	0.0485684
		MR-Egger	0.022 (0.100)	0.823948		0.005 (0.094)	0.959439
		Simple median	0.096 (0.070)	0.172182		0.095 (0.064)	0.135694
		Weighted median	0.027 (0.066)	0.685722		0.026 (0.064)	0.689988
	Cervical-OPLL	IVW	0.093 (0.069)	0.174494		-	-
		MR-Egger	0.040 (0.139)	0.772127		-	-
		Simple median	0.068 (0.100)	0.493741		-	-
		Weighted median	0.038 (0.103)	0.710293		-	-
	Thoracic-OPLL	IVW	0.083 (0.082)	0.309193		0.086 (0.073)	0.238295
		MR-Egger	-0.199 (0.163)	0.224292		-0.191 (0.145)	0.189461
		Simple median	0.063 (0.115)	0.587376		0.013 (0.105)	0.897846
		Weighted median	-0.135 (0.118)	0.251979		-0.153 (0.101)	0.129353
Cerebral aneurysm	ALL-OPLL	IVW	-0.256 (0.111)	0.0206842		-0.215 (0.110)	0.0514689
		MR-Egger	0.256 (0.397)	0.531175		0.222 (0.403)	0.59128
		Simple median	-0.306 (0.112)	0.00633817		-0.202 (0.102)	0.0481263
		Weighted median	-0.149 (0.099)	0.133238		-0.096 (0.088)	0.276954
	Cervical-OPLL	IVW	-0.258 (0.148)	0.0820663		-	-
		MR-Egger	0.400 (0.532)	0.464756		-	-
		Simple median	-0.340 (0.167)	0.0422052		-	-
		Weighted median	-0.265 (0.158)	0.0927827		-	-
	Thoracic-OPLL	IVW	-0.260 (0.136)	0.0566814		-0.157 (0.146)	0.282824
		MR-Egger	-0.333 (0.526)	0.536981		-0.275 (0.562)	0.632787
		Simple median	-0.134 (0.175)	0.444819		-0.008 (0.156)	0.957672
		Weighted median	-0.102 (0.161)	0.526273		0.021 (0.146)	0.887663
Bone mineral density	ALL-OPLL	IVW	0.282 (0.091)	0.00188051		0.332 (0.088)	0.000166416
		MR-Egger	0.147 (0.196)	0.455474		0.218 (0.191)	0.254425
		Simple median	0.332 (0.131)	0.0115128		0.325 (0.123)	0.00833277
		Weighted median	0.077 (0.136)	0.569828		0.186 (0.123)	0.130279
	Cervical-OPLL	IVW	0.056 (0.115)	0.621899		-	-
		MR-Egger	-0.077 (0.248)	0.755311		-	-
		Simple median	-0.001 (0.184)	0.997592		-	-
		Weighted median	-0.141 (0.203)	0.48867		-	-
	Thoracic-OPLL	IVW	0.583 (0.142)	4.14e-05		0.637 (0.127)	5.32e-07
		MR-Egger	0.363 (0.307)	0.238438		0.489 (0.275)	0.0762386
		Simple median	0.790 (0.211)	0.000182741		0.771 (0.182)	2.4e-05
		Weighted median	0.410 (0.231)	0.0764617		0.648 (0.211)	0.00217685
MR, Mendelian randomization; SE, standard error; OPLL, ossification of the posterior longitudinal ligament of the spine; IVW, inverse variance weighted.
