# Supplementary material for: Genetic insights into ossification of the posterior longitudinal ligament of the spine
Source: eLife. 2023 Jul 18;12:e86514. doi: 10.7554/eLife.86514 (PMC10353864; doi:10.7554/eLife.86514)
Supplement: Supplementary file 16. [file elife-86514-supp16.xlsx]

## Sheet: ST16
Supplementaly Table 16. Estimates of Egger intercept in Mendelian randomization for four traits and OPLL
Exposure	Outcome	Result			Result (Replication data added)
		Egger intercept (SE)	P-value		Egger intercept (SE)	P-value
Body mass index	ALL-OPLL	-0.0051 (0.0093)	0.581088		-0.0078 (0.0086)	0.362552
	Cervical-OPLL	0.0064 (0.0132)	0.626732		-	-
	Thoracic-OPLL	-0.0546 (0.0149)	0.000350356		-0.0498 (0.0132)	0.000223155
Type 2 diabetes	ALL-OPLL	0.0059 (0.0074)	0.424071		0.0074 (0.0070)	0.286636
	Cervical-OPLL	0.0045 (0.0103)	0.662368		-	-
	Thoracic-OPLL	0.0241 (0.0121)	0.0480936		0.0236 (0.0107)	0.029115
Cerebral aneurysm	ALL-OPLL	-0.0789 (0.0590)	0.203991		-0.0673 (0.0599)	0.280997
	Cervical-OPLL	-0.1020 (0.0792)	0.220561		-	-
	Thoracic-OPLL	0.0113 (0.0778)	0.886358		0.0182 (0.0833)	0.830395
Bone mineral density	ALL-OPLL	0.0062 (0.0079)	0.436659		0.0052 (0.0077)	0.500133
	Cervical-OPLL	0.0061 (0.0100)	0.542962		-	-
	Thoracic-OPLL	0.0100 (0.0124)	0.419225		0.0067 (0.0111)	0.544
OPLL, ossification of the posterior longitudinal ligament of the spine; SE, standard error.
