# Supplementary material for: Genetic insights into ossification of the posterior longitudinal ligament of the spine
Source: eLife. 2023 Jul 18;12:e86514. doi: 10.7554/eLife.86514 (PMC10353864; doi:10.7554/eLife.86514)
Supplement: Supplementary file 17. [file elife-86514-supp17.xlsx]

## Sheet: ST17
Supplementaly Table 17. Instrument variables in the reverse-direction Mendelian randomization analysis
Outcome trait	No. of SNPs used as instrument variables
	ALL-OPLL
Body mass index	9
Type 2 diabetes	14
Cerebral aneurysm	12
Bone mineral density	14
OPLL, ossification of the posterior longitudinal ligament.
