# Supplementary material for: Genetic insights into ossification of the posterior longitudinal ligament of the spine
Source: eLife. 2023 Jul 18;12:e86514. doi: 10.7554/eLife.86514 (PMC10353864; doi:10.7554/eLife.86514)
Supplement: Supplementary file 18. [file elife-86514-supp18.xlsx]

## Sheet: ST18
Supplementaly Table 18. Reverse-direction Mendelian randomization analysis
Exposure	Outcome	MR-method	Beta (SE)	P-value
ALL-OPLL	Body mass index	IVW	-0.0050 (0.0051)	0.333
		MR-Egger	0.0149 (0.0399)	0.723
		Simple median	-0.0033 (0.0056)	0.552
		Weighted median	-0.0051 (0.0056)	0.361
	Type 2 diabetes	IVW	0.0218 (0.0216)	0.301
		MR-Egger	-0.0900 (0.1016)	0.393
		Simple median	-0.0034 (0.0123)	0.786
		Weighted median	0.0007 (0.0119)	0.952
	Cerebral aneurysm	IVW	-0.0392 (0.0342)	0.252
		MR-Egger	0.1884 (0.226)	0.424
		Simple median	-0.0161 (0.0343)	0.639
		Weighted median	-0.0099 (0.0343)	0.773
	Bone mineral density	IVW	-0.0064 (0.0285)	0.827
		MR-Egger	0.0121 (0.0118)	0.309
		Simple median	0.0139 (0.0075)	0.065
		Weighted median	0.0090 (0.0054)	0.095
Estimates of Egger intercept
Exposure	Outcome	Egger intercept (SE)		P-value
ALL-OPLL	Body mass index	-0.0050 (0.0101)		0.634
	Type 2 diabetes	0.0279 (0.0249)		0.283
	Cerebral aneurysm	-0.0553 (0.0543)		0.332
	Bone mineral density	0.0062 (0.0087)		0.489
MR, Mendelian randomization; OPLL, ossification of the posterior longitudinal ligament; IVW, inverse variance weighted; SE, standard error.
