# Supplementary material for: Genetic insights into ossification of the posterior longitudinal ligament of the spine
Source: eLife. 2023 Jul 18;12:e86514. doi: 10.7554/eLife.86514 (PMC10353864; doi:10.7554/eLife.86514)
Supplement: Supplementary file 19. [file elife-86514-supp19.xlsx]

## Sheet: ST19
Supplementaly Table 19. Results of Mandelian rondomization of body mass index and OPLL using Japanese data only
Exposure	Outcome	MR-method	Beta (SE)	P-value
Body mass index (Japansese)	ALL-OPLL	IVW	0.274 (0.195)	0.159736
		MR-Egger	0.311 (0.570)	0.586307
		Simple median	0.242 (0.246)	0.324458
		Weighted median	0.354 (0.236)	0.133073
	Cervical-OPLL	IVW	0.070 (0.273)	0.797607
		MR-Egger	-0.257 (0.798)	0.748272
		Simple median	0.003 (0.342)	0.992193
		Weighted median	-0.011 (0.344)	0.975114
	Thoracic-OPLL	IVW	1.245 (0.338)	0.000226499
		MR-Egger	2.894 (0.954)	0.00335392
		Simple median	1.755 (0.435)	5.55e-05
		Weighted median	1.899 (0.437)	1.41e-05
Estimates of Egger intercept
Exposure	Outcome	Egger intercept (SE)	P-value
Body mass index (Japansese)	ALL-OPLL	-0.0012 (0.0169)	0.944302
	Cervical-OPLL	0.0103 (0.0236)	0.663845
	Thoracic-OPLL	-0.0524 (0.0284)	0.0692943
OPLL, ossification of the posterior longitudinal ligament; MR, Mendelian randomization; IVW, inverse variance weighted; SE, standard error.
