# Supplementary material for: Genetic insights into ossification of the posterior longitudinal ligament of the spine
Source: eLife. 2023 Jul 18;12:e86514. doi: 10.7554/eLife.86514 (PMC10353864; doi:10.7554/eLife.86514)
Supplement: Supplementary file 20. [file elife-86514-supp20.xlsx]

## Sheet: ST20
Supplementaly Table 20. Instrument variables used in additional Mendelian randomization for obesity related traits
Trait	Study	Study design	Ethnicity	No. of significant SNPs	No. of SNPs used as instrument variables
					ALL-OPLL	Cervical-OPLL	Thoracic-OPLL
Body mass index	Pulit et al. Hum Mol Genet. 2019	GWAS meta-analysis (UKBB + GIANT)	Europeans	670	585	586	584
Waist-to-hip ratio				316	287	288	287
Waist-to-hip ratio adjusted for body mass index				346	293	293	293
OPLL, ossification of the posterior longitudinal ligament; GWAS, genome wide association study; UKBB, UK Biobank; GIANT, The Genetic Investigation of ANthropometric Traits consortium
