# Supplementary material for: Genetic insights into ossification of the posterior longitudinal ligament of the spine
Source: eLife. 2023 Jul 18;12:e86514. doi: 10.7554/eLife.86514 (PMC10353864; doi:10.7554/eLife.86514)
Supplement: Supplementary file 21. [file elife-86514-supp21.xlsx]

## Sheet: ST21
Supplementaly Table 21. MR analyses inferring causality of the obesity-related traits on OPLL
Exposure	Outcome	MR-method	Result			Result (Replication data added)
			Beta (SE)	P-value		Beta (SE)	P-value
Body mass index (UKBB + GIANT)	ALL-OPLL	IVW	0.673 (0.121)	2.96e-08		0.730 (0.118)	6e-10
		MR-Egger	0.867 (0.336)	0.0100424		1.031 (0.326)	0.00164001
		Simple median	0.698 (0.175)	6.59e-05		0.662 (0.168)	8.22e-05
		Weighted median	0.780 (0.199)	8.82e-05		0.903 (0.181)	5.65e-07
	Cervical-OPLL	IVW	0.421 (0.174)	0.0156025		-	-
		MR-Egger	0.288 (0.482)	0.549902		-	-
		Simple median	0.356 (0.266)	0.180231		-	-
		Weighted median	0.075 (0.289)	0.794079		-	-
	Thoracic-OPLL	IVW	1.294 (0.192)	1.57e-11		1.294 (0.173)	8.18e-14
		MR-Egger	2.833 (0.521)	8.16e-08		2.787 (0.471)	5.47e-09
		Simple median	0.880 (0.306)	0.00399791		1.153 (0.277)	3.16e-05
		Weighted median	1.716 (0.319)	7.23e-08		1.859 (0.277)	1.86e-11
Waist-to-hip ratio	ALL-OPLL	IVW	0.472 (0.171)	0.00582885		0.540 (0.164)	0.00101837
		MR-Egger	0.225 (0.584)	0.700114		-0.066 (0.559)	0.906527
		Simple median	0.715 (0.240)	0.00285294		0.750 (0.244)	0.00214643
		Weighted median	0.431 (0.245)	0.0788034		0.486 (0.231)	0.0351718
	Cervical-OPLL	IVW	0.176 (0.250)	0.481745		-	-
		MR-Egger	0.122 (0.854)	0.886855		-	-
		Simple median	0.414 (0.361)	0.252217		-	-
		Weighted median	0.171 (0.364)	0.639445		-	-
	Thoracic-OPLL	IVW	1.219 (0.278)	1.15e-05		1.217 (0.250)	1.17e-06
		MR-Egger	0.594 (0.943)	0.529116		-0.212 (0.845)	0.80196
		Simple median	1.294 (0.413)	0.00170651		1.346 (0.364)	0.000216442
		Weighted median	0.968 (0.403)	0.0164407		0.897 (0.361)	0.0128381
Waist-to-hip ratio adjusted by body mass index	ALL-OPLL	IVW	-0.031 (0.159)	0.844218		-0.046 (0.152)	0.763121
		MR-Egger	0.192 (0.471)	0.68354		0.099 (0.450)	0.826414
		Simple median	0.210 (0.221)	0.34139		0.142 (0.215)	0.509279
		Weighted median	0.006 (0.224)	0.976956		-0.017 (0.207)	0.935278
	Cervical-OPLL	IVW	-0.038 (0.217)	0.861202		-	-
		MR-Egger	0.064 (0.642)	0.921143		-	-
		Simple median	0.070 (0.322)	0.828576		-	-
		Weighted median	-0.127 (0.319)	0.689868		-	-
	Thoracic-OPLL	IVW	0.256 (0.230)	0.265804		0.154 (0.204)	0.449488
		MR-Egger	0.162 (0.679)	0.811338		-0.062 (0.602)	0.917964
		Simple median	0.565 (0.368)	0.124498		0.281 (0.322)	0.383454
		Weighted median	0.299 (0.356)	0.401211		0.333 (0.317)	0.29364
MR, Mendelian randomization; OPLL, ossification of the posterior longitudinal ligament of the spine; SE, standard error; UKBB, UK Biobank; GIANT, The Genetic Investigation of ANthropometric Traits consortium; IVW, inverse variance weighted.
