# Supplementary material for: Genetic insights into ossification of the posterior longitudinal ligament of the spine
Source: eLife. 2023 Jul 18;12:e86514. doi: 10.7554/eLife.86514 (PMC10353864; doi:10.7554/eLife.86514)
Supplement: Supplementary file 22. [file elife-86514-supp22.xlsx]

## Sheet: ST22
Supplementaly Table 22. Estimates of Egger intercept in Mendelian randomization for obesity-related traits and OPLL
Exposure	Outcome	Result			Result (Replication data added)
		Egger intercept (SE)	P-value		Egger intercept (SE)	P-value
Body mass index (UKBB + GIANT)	ALL-OPLL	-0.0033 (0.0053)	0.534838		-0.0051 (0.0051)	0.322189
	Cervical-OPLL	0.0022 (0.0076)	0.768854		-	-
	Thoracic-OPLL	-0.0261 (0.0082)	0.00160323		-0.0253 (0.0074)	0.000703387
Waist-to-hip ratio	ALL-OPLL	0.0041 (0.0093)	0.658675		0.0101 (0.0089)	0.257966
	Cervical-OPLL	0.0009 (0.0136)	0.947089		-	-
	Thoracic-OPLL	0.0104 (0.0150)	0.488739		0.0239 (0.0135)	0.0777028
Waist-to-hip ratio adjusted by bosy mass index	ALL-OPLL	-0.0042 (0.0083)	0.614643		-0.0027 (0.0080)	0.733104
	Cervical-OPLL	-0.0019 (0.0114)	0.866783		-	-
	Thoracic-OPLL	0.0018 (0.0121)	0.883207		0.0041 (0.0107)	0.702855
OPLL, ossification of the posterior longitudinal ligament of the spine; SE, standard error; UKBB, UK Biobank; GIANT, The Genetic Investigation of ANthropometric Traits consortium.
